# Supplementary material for: Chloroplast Electron Chain, ROS Production, and Redox Homeostasis Are Modulated by COS-OGA Elicitation in Tomato (Solanum lycopersicum) Leaves
Source: Front Plant Sci. 2020 Dec 14;11:597589. doi: 10.3389/fpls.2020.597589 (PMC7768011; doi:10.3389/fpls.2020.597589)
Supplement: Supplementary file 3 [file Table_3.XLSX]

## Sheet: Hormones
Supplementary Table 2. Differentially expressed genes in tomato leaves after three sprayings with COS-OGA (62.5 mg/l) in comparison to control (FDR < 0.05; |log_2 Fold Change| >1).
Classification	ID	Log(FC)	ITAG	Description
Auxin	Solyc02g037550.2	3.86	moderately similar to ( 377) AT1G76520 | Symbols: | auxin efflux carrier family protein | chr1:28715384-28717289 FORWARDmoderately similar to ( 345) loc_os09g31478 12009.m06269 protein auxin hydrogen symporter, putative, expressed Mem_trans genomic_reference:SL2.40ch02 gene_region:21802644-21806318 transcript_region:SL2.40ch02:21802644..21806318- go_terms:GO:0009672 functional_description:"Auxin …	Auxin efflux carrier family protein
Auxin	solyc05g041870.1	2.63	weakly similar to ( 147) AT5G47530 | Symbols: | auxin-responsive protein, putative | chr5:19281471-19282870 FORWARDweakly similar to ( 132) loc_os08g24790 12008.m06498 protein membrane protein, putative, expressed DUF568 evidence_code:10F0H1E1IEG genomic_reference:SL2.40ch05 gene_region:52937644-52938210 transcript_region:SL2.40ch05:52937644..52938210- functional_description:"Auxin-induced protei…	Auxin-induced protein-like
Auxin	solyc09g009980.1	2.04	weakly similar to ( 124) AT2G36210 | Symbols: | auxin-responsive family protein | chr2:15186326-15186733 REVERSEAuxin_inducible evidence_code:10F0H1E0IEG genomic_reference:SL2.40ch09 gene_region:3436952-3437398 transcript_region:SL2.40ch09:3436952..3437398+ functional_description:"Auxin-induced SAUR-like protein (AHRD V1 *--- Q8S349_CAPAN); contains Interpro domain(s) IPR003676 Auxin responsive S…	Auxin responsive SAUR protein
Auxin	solyc10g018340.1	1.59	weakly similar to ( 129) AT2G45210 | Symbols: | auxin-responsive protein-related | chr2:18641884-18642372 FORWARDAuxin_inducible evidence_code:10F1H1E1IEG genomic_reference:SL2.40ch10 gene_region:7363928-7364344 transcript_region:SL2.40ch10:7363928..7364344- functional_description:"Auxin responsive SAUR protein (AHRD V1 *-*- Q1SN26_MEDTR); contains Interpro domain(s) IPR003676 Auxin responsive SA…	Auxin responsive SAUR protein
Auxin	solyc12g095750.1	1.55	moderately similar to ( 374) AT1G20925 | Symbols: | auxin efflux carrier family protein | chr1:7290612-7292507 FORWARDmoderately similar to ( 364) loc_os09g31478 12009.m06269 protein auxin hydrogen symporter, putative, expressed Mem_trans evidence_code:10F0H1E1IEG genomic_reference:SL2.40ch12 gene_region:63226386-63230171 transcript_region:SL2.40ch12:63226386..63230171+ go_terms:GO:0009672 functi…	Auxin efflux carrier family protein
Auxin	solyc03g082530.1	1.44	very weakly similar to (91.3) AT4G00880 | Symbols: | auxin-responsive family protein | chr4:366692-367060 REVERSEAuxin_inducible evidence_code:10F1H0E1IEG genomic_reference:SL2.40ch03 gene_region:46007641-46008009 transcript_region:SL2.40ch03:46007641..46008009- functional_description:"Auxin-responsive family protein (AHRD V1 ***- D7M515_ARALY); contains Interpro domain(s) IPR003676 Auxin respons…	Auxin responsive SAUR protein
Auxin	solyc07g042490.1	1.03	weakly similar to ( 107) AT5G20820 | Symbols: | auxin-responsive protein-related | chr5:7046911-7047294 REVERSEweakly similar to ( 114) loc_os08g35110 12008.m07500 protein OsSAUR33 - Auxin-responsive SAUR gene family member, expressed evidence_code:10F1H0E1IEG genomic_reference:SL2.40ch07 gene_region:53019216-53019608 transcript_region:SL2.40ch07:53019216..53019608- functional_description:"SAUR33…	SAUR33-auxin-responsive SAUR family member
Auxin	solyc08g068490.2	-1.16	moderately similar to ( 479) AT4G03400 | Symbols: DFL2, GH3-10 | DFL2 (DWARF IN LIGHT 2) | chr4:1497675-1499729 REVERSEmoderately similar to ( 335) GH35_ORYSA Probable indole-3-acetic acid-amido synthetase GH3.5 (EC 6.3.2.-) (Auxin-responsive GH3-like protein 5) (OsGH3-5) - Oryza sativa (Rice)moderately similar to ( 335) loc_os05g50890 12005.m27991 protein indole-3-acetic acid-amido synthetase GH…	Indole-3-acetic acid-amido synthetase GH3.8
Auxin	solyc02g077880.2	-1.28	weakly similar to ( 124) AT1G28330 | Symbols: | DYL1 (DORMANCY-ASSOCIATED PROTEIN-LIKE 1) | chr1:9934134-9935216 REVERSEweakly similar to ( 109) 12KD_FRAAN Auxin-repressed 12.5 kDa protein - Fragaria ananassa (Strawberry)very weakly similar to (99.4) loc_os11g44810 12011.m28867 protein auxin-repressed 12.5 kDa protein, putative, expressedAuxin_repressed genomic_reference:SL2.40ch02 gene_region:37…	Auxin-repressed protein
Auxin	solyc08g068480.1	-1.29	weakly similar to ( 107) AT4G03400 | Symbols: DFL2, GH3-10 | DFL2 (DWARF IN LIGHT 2) | chr4:1497675-1499729 REVERSEvery weakly similar to (83.2) GH35_ORYSA Probable indole-3-acetic acid-amido synthetase GH3.5 (EC 6.3.2.-) (Auxin-responsive GH3-like protein 5) (OsGH3-5) - Oryza sativa (Rice)very weakly similar to (87.8) loc_os01g12160 12001.m07831 protein indole-3-acetic acid-amido synthetase GH3.…	Indole-3-acetic acid-amido synthetase GH3.8
Auxin	solyc01g107400.2	-1.38	genomic_reference:SL2.40ch01 gene_region:86730679-86731267 transcript_region:SL2.40ch01:86730679..86731267- functional_description:"Indole-3-acetic acid-amido synthetase GH3.8 (AHRD V1 ***- B6U4E2_MAIZE)"	Indole-3-acetic acid-amido synthetase GH3.8
Auxin	solyc10g054720.1	-1.99	weakly similar to ( 167) AT1G75580 | Symbols: | auxin-responsive protein, putative | chr1:28377530-28377856 FORWARDvery weakly similar to (89.4) ARG7_PHAAU Indole-3-acetic acid-induced protein ARG7 - Phaseolus aureus (Mung bean) (Vigna radiata)weakly similar to ( 110) loc_os02g24700 12002.m07617 protein OsSAUR8 - Auxin-responsive SAUR gene family member, expressedAuxin_inducible evidence_code:10F…	Auxin responsive SAUR protein
Auxin	solyc03g006360.2	-2.78	weakly similar to ( 120) AT1G28330 | Symbols: | DYL1 (DORMANCY-ASSOCIATED PROTEIN-LIKE 1) | chr1:9934134-9935216 REVERSEvery weakly similar to (98.2) 12KD_FRAAN Auxin-repressed 12.5 kDa protein - Fragaria ananassa (Strawberry)very weakly similar to (97.4) loc_os11g44810 12011.m28867 protein auxin-repressed 12.5 kDa protein, putative, expressedAuxin_repressed genomic_reference:SL2.40ch03 gene_regi…	Auxin-repressed protein
Classification	ID	Log(FC)	ITAG	Description
GA	solyc01g058250.1	2.51	moderately similar to ( 294) AT1G15550 | Symbols: GA4, ATGA3OX1, GA3OX1 | GA3OX1 (GIBBERELLIN 3-OXIDASE 1); gibberellin 3-beta-dioxygenase/ transcription factor binding | chr1:5344569-5346078 REVERSEmoderately similar to ( 220) G3O23_WHEAT Gibberellin 3-beta-dioxygenase 2-3 (EC 1.14.11.15) (Gibberellin 3 beta-hydroxylase 2-3) (Gibberellin 3-oxidase 2-3) - Triticum aestivum (Wheat)moderately simil…	Gibberellin 3-beta-hydrolase
GA	solyc02g070430.2	2.44	moderately similar to ( 391) AT1G30040 | Symbols: ATGA2OX2 | ATGA2OX2 (GIBBERELLIN 2-OXIDASE); gibberellin 2-beta-dioxygenase | chr1:10537769-10538781 FORWARDmoderately similar to ( 410) G2OX1_PEA Gibberellin 2-beta-dioxygenase 1 (EC 1.14.11.13) (Gibberellin 2-beta-hydroxylase 1) (Gibberellin 2-oxidase 1) (GA 2-oxidase 1) (Protein SLENDER) - Pisum sativum (Garden pea)moderately similar to ( 350) …	Gibberellin 2-oxidase 1
GA	solyc10g007570.2	2	moderately similar to ( 260) AT1G78440 | Symbols: ATGA2OX1 | ATGA2OX1 (gibberellin 2-oxidase 1); gibberellin 2-beta-dioxygenase | chr1:29511772-29512990 REVERSEmoderately similar to ( 293) G2OX1_PEA Gibberellin 2-beta-dioxygenase 1 (EC 1.14.11.13) (Gibberellin 2-beta-hydroxylase 1) (Gibberellin 2-oxidase 1) (GA 2-oxidase 1) (Protein SLENDER) - Pisum sativum (Garden pea)moderately similar to ( 253…	Gibberellin 2-oxidase 3
GA	solyc10g007560.1	1.71	very weakly similar to (81.6) AT1G30040 | Symbols: ATGA2OX2 | ATGA2OX2 (GIBBERELLIN 2-OXIDASE); gibberellin 2-beta-dioxygenase | chr1:10537769-10538781 FORWARDvery weakly similar to (85.1) G2OX1_PEA Gibberellin 2-beta-dioxygenase 1 (EC 1.14.11.13) (Gibberellin 2-beta-hydroxylase 1) (Gibberellin 2-oxidase 1) (GA 2-oxidase 1) (Protein SLENDER) - Pisum sativum (Garden pea) evidence_code:10F0H1E0IEG …	Gibberellin 2-oxidase 3
GA	solyc06g082030.2	1.25	moderately similar to ( 212) AT5G58660 | Symbols: | oxidoreductase, 2OG-Fe(II) oxygenase family protein | chr5:23701509-23703802 FORWARDweakly similar to ( 121) ACCO1_PETHY 1-aminocyclopropane-1-carboxylate oxidase 1 (EC 1.14.17.4) (ACC oxidase 1) (Ethylene-forming enzyme) (EFE) (ACCO) - Petunia hybrida (Petunia)weakly similar to ( 166) loc_os04g33360 12004.m08432 protein gibberellin 2-beta-dioxy…	Gibberellin 2-beta-dioxygenase 7
GA	solyc09g074270.2	1.17	highly similar to ( 569) AT3G63010 | Symbols: ATGID1B, GID1B | GID1B (GA INSENSITIVE DWARF1B); hydrolase | chr3:23289717-23290998 FORWARDmoderately similar to ( 448) GID1_ORYSA Gibberellin receptor GID1 (EC 3.-.-.-) (Gibberellin-insensitive dwarf protein 1) (Protein GIBBERELLIN INSENSITIVE DWARF1) - Oryza sativa (Rice)moderately similar to ( 448) loc_os05g33730 12005.m07605 protein gibberellin re…	Acetyl esterase
GA	solyc05g006160.2	-1.34	genomic_reference:SL2.40ch05 gene_region:846758-847742 transcript_region:SL2.40ch05:846758..847742- go_terms:GO:0005515 functional_description:"Gibberellin-regulated protein 2 (AHRD V1 **-- B6TLZ8_MAIZE); contains Interpro domain(s) IPR003854 Gibberellin regulated protein "	Gibberellin-regulated protein 2
GA	solyc06g007890.2	-1.67	genomic_reference:SL2.40ch06 gene_region:1784223-1785855 transcript_region:SL2.40ch06:1784223..1785855+ go_terms:GO:0005515 functional_description:"Gibberellin regulated protein (AHRD V1 **-- Q2HRH3_MEDTR); contains Interpro domain(s) IPR003854 Gibberellin regulated protein "	Gibberellin regulated protein
GA	solyc05g053340.2	-2.12	moderately similar to ( 317) AT1G02400 | Symbols: ATGA2OX4, ATGA2OX6, DTA1, GA2OX6 | GA2OX6 (GIBBERELLIN 2-OXIDASE 6); gibberellin 2-beta-dioxygenase | chr1:486964-489391 FORWARDmoderately similar to ( 368) G2OX2_PEA Gibberellin 2-beta-dioxygenase 2 (EC 1.14.11.13) (Gibberellin 2-beta-hydroxylase 2) (Gibberellin 2-oxidase 2) (GA 2-oxidase 2) - Pisum sativum (Garden pea)moderately similar to ( 253…	Gibberellin 2-oxidase
Classification	ID	Log(FC)	ITAG	Description
JA	solyc01g099160.2	1.42	nearly identical (1181) AT1G55020 | Symbols: LOX1 | LOX1; lipoxygenase | chr1:20525798-20530143 FORWARDnearly identical (1358) LOX1_SOLTU Lipoxygenase 1 (EC 1.13.11.12) - Solanum tuberosum (Potato)nearly identical (1054) loc_os03g49380 12003.m35371 protein lipoxygenase 4, putative, expressedLipoxygenase PLAT_LH2 LH2 PLAT genomic_reference:SL2.40ch01 gene_region:81236488-81243938 transcript_region…	Lipoxygenase
JA	solyc01g099180.2	-1.38	nearly identical (1128) AT1G55020 | Symbols: LOX1 | LOX1; lipoxygenase | chr1:20525798-20530143 FORWARDnearly identical (1306) LOX1_SOLTU Lipoxygenase 1 (EC 1.13.11.12) - Solanum tuberosum (Potato)nearly identical (1030) loc_os03g49380 12003.m35371 protein lipoxygenase 4, putative, expressedLipoxygenase PLAT_LH2 LH2 PLAT genomic_reference:SL2.40ch01 gene_region:81247783-81251321 transcript_region…	Lipoxygenase
JA	solyc11g032220.1	-1.39	moderately similar to ( 360) AT1G76690 | Symbols: OPR2, ATOPR2 | OPR2 | chr1:28778976-28780355 FORWARDmoderately similar to ( 322) loc_os06g11290 12006.m05846 protein 12-oxophytodienoate reductase 2, putative, expressed OYE_like_FMN PRK10605 NemA OYE_like_FMN_family Oxidored_FMN OYE_like_5_FMN OYE_like_3_FMN OYE_YqiM_FMN OYE_like_2_FMN OYE_like_4_FMN evidence_code:10F0H1E0IEG genomic_reference:SL…	NADPH dehydrogenase 1
JA	solyc01g099150.2	-2.36	highly similar to ( 797) AT1G55020 | Symbols: LOX1 | LOX1; lipoxygenase | chr1:20525798-20530143 FORWARDhighly similar to ( 905) LOX1_SOLTU Lipoxygenase 1 (EC 1.13.11.12) - Solanum tuberosum (Potato)highly similar to ( 736) loc_os03g49380 12003.m35371 protein lipoxygenase 4, putative, expressedLipoxygenase genomic_reference:SL2.40ch01 gene_region:81224470-81230198 transcript_region:SL2.40ch01:812…	Lipoxygenase
Classification	ID	Log(FC)	ITAG	Description
SA	solyc04g055260.2	2.33	moderately similar to ( 273) AT5G66430 | Symbols: | S-adenosyl-L-methionine:carboxyl methyltransferase family protein | chr5:26525410-26526799 REVERSEmoderately similar to ( 243) BAMT_ANTMA Benzoate carboxyl methyltransferase (EC 2.1.1.-) (S-adenosyl-L-methionine:benzoic acid carboxyl methyltransferase) - Antirrhinum majus (Garden snapdragon)moderately similar to ( 267) loc_os01g50610 12001.m1506…	Carboxyl methyltransferase
Classification	ID	Log(FC)	ITAG	Description
ABA	solyc08g016720.1	1.05	highly similar to ( 847) AT1G30100 | Symbols: NCED5, ATNCED5 | NCED5 (NINE-CIS-EPOXYCAROTENOID DIOXYGENASE 5); 9-cis-epoxycarotenoid dioxygenase | chr1:10571383-10573152 FORWARDhighly similar to ( 759) loc_os03g44380 12003.m09477 protein 9-cis-epoxycarotenoid dioxygenase 2, putative, expressed RPE65 COG3670 evidence_code:10F0H1E0IEG genomic_reference:SL2.40ch08 gene_region:8634393-8636138 transcr…	9-cis-epoxycarotenoid dioxygenase 5
ABA	solyc08g065410.1	-1.23	moderately similar to ( 219) AT2G26040 | Symbols: | Bet v I allergen family protein | chr2:11094832-11095404 REVERSEweakly similar to ( 182) loc_os02g13330 12002.m06580 protein cyclase/dehydrase family protein, putative evidence_code:10F0H1E0IEG genomic_reference:SL2.40ch08 gene_region:50580951-50581621 transcript_region:SL2.40ch08:50580951..50581621- go_terms:GO:0004872,GO:0042803 functional_des…	Abscisic acid receptor PYL2
ABA	solyc03g095780.1	-1.29	moderately similar to ( 224) AT2G38310 | Symbols: | unknown protein | chr2:16050251-16050874 FORWARDweakly similar to ( 188) loc_os05g12260 12005.m05693 protein CAPIP1, putative, expressed evidence_code:10F1H1E1IEG genomic_reference:SL2.40ch03 gene_region:50483220-50483825 transcript_region:SL2.40ch03:50483220..50483825+ go_terms:GO:0004872,GO:0042803 functional_description:"Abscisic acid recepto…	Abscisic acid receptor PYL6
Classification	ID	Log(FC)	ITAG	Description
ET	solyc01g067620.2	2.32	highly similar to ( 510) AT3G21420 | Symbols: | oxidoreductase, 2OG-Fe(II) oxygenase family protein | chr3:7541579-7543221 FORWARDweakly similar to ( 200) FLS_SOLTU Flavonol synthase/flavanone 3-hydroxylase (EC 1.14.11.23) (EC 1.14.11.9) (FLS) - Solanum tuberosum (Potato)moderately similar to ( 451) loc_os01g70930 12001.m13137 protein flavonol synthase/flavanone 3-hydroxylase, putative, expressed…	1-aminocyclopropane-1-carboxylate oxidase
ET	solyc11g007890.1	2.1	moderately similar to ( 411) AT2G36690 | Symbols: | oxidoreductase, 2OG-Fe(II) oxygenase family protein | chr2:15379930-15381987 FORWARDweakly similar to ( 168) LDOX_MALDO Leucoanthocyanidin dioxygenase (EC 1.14.11.19) (LDOX) (Leucocyanidin oxygenase) (Leucoanthocyanidin hydroxylase) (Anthocyanidin synthase) - Malus domestica (Apple) (Malus sylvestris)moderately similar to ( 343) loc_os08g44590 1…	1-aminocyclopropane-1-carboxylate oxidase 4
ET	solyc07g049530.2	1.15	moderately similar to ( 455) AT1G05010 | Symbols: EFE, ACO4, EAT1 | EFE (ETHYLENE-FORMING ENZYME); 1-aminocyclopropane-1-carboxylate oxidase | chr1:1431419-1432695 REVERSEhighly similar to ( 563) ACCO3_PETHY 1-aminocyclopropane-1-carboxylate oxidase 3 (EC 1.14.17.4) (ACC oxidase 3) (Ethylene-forming enzyme) (EFE) - Petunia hybrida (Petunia)moderately similar to ( 409) loc_os09g27820 12009.m05933 …	1-aminocyclopropane-1-carboxylate oxidase
ET	solyc11g010410.1	-1.14	moderately similar to ( 243) AT5G24530 | Symbols: DMR6 | DMR6 (DOWNY MILDEW RESISTANT 6); oxidoreductase/ oxidoreductase, acting on paired donors, with incorporation or reduction of molecular oxygen, 2-oxoglutarate as one donor, and incorporation of one atom each of oxygen into both donors | chr5:8378964-8383154 FORWARDweakly similar to ( 169) FL3H_DIACA Naringenin,2-oxoglutarate 3-dioxygenase (E…	1-aminocyclopropane-1-carboxylate oxidase
ET	solyc12g005940.1	-1.94	moderately similar to ( 448) AT1G05010 | Symbols: EFE, ACO4, EAT1 | EFE (ETHYLENE-FORMING ENZYME); 1-aminocyclopropane-1-carboxylate oxidase | chr1:1431419-1432695 REVERSEhighly similar to ( 544) ACCO3_PETHY 1-aminocyclopropane-1-carboxylate oxidase 3 (EC 1.14.17.4) (ACC oxidase 3) (Ethylene-forming enzyme) (EFE) - Petunia hybrida (Petunia)moderately similar to ( 409) loc_os09g27820 12009.m05933 …	1-aminocyclopropane-1-carboxylate oxidase
Classification	ID	Log(FC)	ITAG	Description
Cytokinin	solyc12g008900.1	-1.68	highly similar to ( 545) AT5G56970 | Symbols: CKX3, ATCKX3 | CKX3 (CYTOKININ OXIDASE 3); amine oxidase/ cytokinin dehydrogenase | chr5:23044944-23048245 REVERSEmoderately similar to ( 421) CKX1_MAIZE Cytokinin dehydrogenase 1 precursor (EC 1.5.99.12) (Cytokinin oxidase 1) (CKO 1) (COX 1) (ZmCKX1) - Zea mays (Maize)moderately similar to ( 456) loc_os01g56810 12001.m11838 protein cytokinin dehydrog…	Cytokinin oxidase/dehydrogenase 2
,

## Sheet: Photosynthesis
Classification	ID	Log(FC)	ITAG	Description
Photosystem I	solyc06g009940.1	2.73	very weakly similar to ( 100) ATCG00350 | Symbols: PSAA | Encodes psaA protein comprising the reaction center for photosystem I along with psaB protein; hydrophobic protein encoded by the chloroplast genome. | chrC:39605-41857 REVERSEweakly similar to ( 101) PSAA_TOBAC Photosystem I P700 chlorophyll a apoprotein A1 (PsaA) (PSI-A) - Nicotiana tabacum (Common tobacco)very weakly similar to (96.3) l…	Photosystem I P700 chlorophyll a apoprotein A1; Photosystem I psaA and psaB
Photosystem I	solyc10g052740.1	2.64	weakly similar to ( 180) ATCG00350 | Symbols: PSAA | Encodes psaA protein comprising the reaction center for photosystem I along with psaB protein; hydrophobic protein encoded by the chloroplast genome. | chrC:39605-41857 REVERSEweakly similar to ( 181) PSAA_PEA Photosystem I P700 chlorophyll a apoprotein A1 (PsaA) (PSI-A) - Pisum sativum (Garden pea)weakly similar to ( 173) loc_osp1g00340 11562.…	Photosystem I P700 chlorophyll a apoprotein A1; Photosystem I psaA and psaB
Photosystem I	solyc10g017900.1	2.52	weakly similar to ( 176) ATCG00350 | Symbols: PSAA | Encodes psaA protein comprising the reaction center for photosystem I along with psaB protein; hydrophobic protein encoded by the chloroplast genome. | chrC:39605-41857 REVERSEweakly similar to ( 177) PSAA_PSINU Photosystem I P700 chlorophyll a apoprotein A1 (PsaA) (PSI-A) - Psilotum nudum (Whisk fern)weakly similar to ( 190) loc_os01g57974 120…	Photosystem I P700 chlorophyll a apoprotein; Photosystem I psaA and psaB
Photosystem I	solyc01g017330.1	2.44	weakly similar to ( 197) ATCG00350 | Symbols: PSAA | Encodes psaA protein comprising the reaction center for photosystem I along with psaB protein; hydrophobic protein encoded by the chloroplast genome. | chrC:39605-41857 REVERSEmoderately similar to ( 201) PSAA_ATRBE Photosystem I P700 chlorophyll a apoprotein A1 (PsaA) (PSI-A) - Atropa belladonna (Belladonna) (Deadly nightshade)weakly similar t…	Photosystem I P700 chlorophyll a apoprotein A1; Photosystem I psaA and psaB
Photosystem I	solyc09g059640.1	2.4	weakly similar to ( 115) ATCG00340 | Symbols: PSAB | Encodes the D1 subunit of photosystem I and II reaction centers. | chrC:37375-39579 REVERSEweakly similar to ( 122) PSAB_ATRBE Photosystem I P700 chlorophyll a apoprotein A2 (PsaB) (PSI-B) - Atropa belladonna (Belladonna) (Deadly nightshade)weakly similar to ( 117) loc_osp1g00330 11562.m00022 protein photosystem I P700 apoprotein A2psaB PsaA_Ps…	Photosystem I P700 chlorophyll a apoprotein A2; Photosystem I psaA and psaB
Photosystem I	solyc01g018090.1	2.39	weakly similar to ( 112) ATCG00350 | Symbols: PSAA | Encodes psaA protein comprising the reaction center for photosystem I along with psaB protein; hydrophobic protein encoded by the chloroplast genome. | chrC:39605-41857 REVERSEweakly similar to ( 112) PSAA_WHEAT Photosystem I P700 chlorophyll a apoprotein A1 (PsaA) (PSI-A) - Triticum aestivum (Wheat)weakly similar to ( 105) loc_osp1g00340 11562…	Photosystem I P700 chlorophyll a apoprotein A1; Photosystem I psaA and psaB
Photosystem I	solyc01g017320.1	2.37	weakly similar to ( 119) ATCG00350 | Symbols: PSAA | Encodes psaA protein comprising the reaction center for photosystem I along with psaB protein; hydrophobic protein encoded by the chloroplast genome. | chrC:39605-41857 REVERSEweakly similar to ( 120) PSAA_ATRBE Photosystem I P700 chlorophyll a apoprotein A1 (PsaA) (PSI-A) - Atropa belladonna (Belladonna) (Deadly nightshade)weakly similar to ( …	Photosystem I P700 chlorophyll a apoprotein A1; Photosystem I psaA and psaB
Photosystem I	solyc12g032960.1	2.32	weakly similar to ( 139) ATCG00350 | Symbols: PSAA | Encodes psaA protein comprising the reaction center for photosystem I along with psaB protein; hydrophobic protein encoded by the chloroplast genome. | chrC:39605-41857 REVERSEweakly similar to ( 139) PSAA_ATRBE Photosystem I P700 chlorophyll a apoprotein A1 (PsaA) (PSI-A) - Atropa belladonna (Belladonna) (Deadly nightshade)weakly similar to ( …	Photosystem I P700 chlorophyll a apoprotein; Photosystem I psaA and psaB
Photosystem I	solyc12g033040.1	2.27	moderately similar to ( 259) ATCG00350 | Symbols: PSAA | Encodes psaA protein comprising the reaction center for photosystem I along with psaB protein; hydrophobic protein encoded by the chloroplast genome. | chrC:39605-41857 REVERSEmoderately similar to ( 263) PSAA_SPIOL Photosystem I P700 chlorophyll a apoprotein A1 (PsaA) (PSI-A) - Spinacia oleracea (Spinach)moderately similar to ( 259) loc_os…	Photosystem I P700 chlorophyll a apoprotein A1; Photosystem I psaA and psaB
Photosystem I	solyc04g016170.1	2.2	weakly similar to ( 129) ATCG00340 | Symbols: PSAB | Encodes the D1 subunit of photosystem I and II reaction centers. | chrC:37375-39579 REVERSEweakly similar to ( 130) PSAB_OENHO Photosystem I P700 chlorophyll a apoprotein A2 (PsaB) (PSI-B) - Oenothera hookeri (Hookers evening primrose)weakly similar to ( 129) loc_osp1g00330 11562.m00022 protein photosystem I P700 apoprotein A2psaB PsaA_PsaB evi…	Photosystem I P700 chlorophyll a apoprotein A2; Photosystem I psaA and psaB
Photosystem I	solyc07g021240.1	2.16	weakly similar to ( 200) ATCG00340 | Symbols: PSAB | Encodes the D1 subunit of photosystem I and II reaction centers. | chrC:37375-39579 REVERSEweakly similar to ( 200) PSAB_SACOF Photosystem I P700 chlorophyll a apoprotein A2 (PsaB) (PSI-B) - Saccharum officinarum (Sugarcane)weakly similar to ( 199) loc_osp1g00330 11562.m00022 protein photosystem I P700 apoprotein A2psaB PsaA_PsaB psaA evidence_…	Photosystem I P700 chlorophyll a apoprotein A2; Photosystem I psaA and psaB
Photosystem I	solyc10g017890.1	2.1	moderately similar to ( 258) ATCG00350 | Symbols: PSAA | Encodes psaA protein comprising the reaction center for photosystem I along with psaB protein; hydrophobic protein encoded by the chloroplast genome. | chrC:39605-41857 REVERSEmoderately similar to ( 259) PSAA_TOBAC Photosystem I P700 chlorophyll a apoprotein A1 (PsaA) (PSI-A) - Nicotiana tabacum (Common tobacco)moderately similar to ( 247)…	Photosystem I P700 chlorophyll a apoprotein; Photosystem I psaA and psaB
Photosystem I	solyc10g017910.1	1.94	weakly similar to ( 163) ATCG00340 | Symbols: PSAB | Encodes the D1 subunit of photosystem I and II reaction centers. | chrC:37375-39579 REVERSEweakly similar to ( 164) PSAB_ATRBE Photosystem I P700 chlorophyll a apoprotein A2 (PsaB) (PSI-B) - Atropa belladonna (Belladonna) (Deadly nightshade)weakly similar to ( 163) loc_osp1g00330 11562.m00022 protein photosystem I P700 apoprotein A2psaB PsaA_Ps…	Photosystem I P700 chlorophyll a apoprotein A2; Photosystem I psaA and psaB
Photosystem I	solyc01g007360.2	1.82	moderately similar to ( 249) ATCG00520 | Symbols: YCF4 | Encodes a protein required for photosystem I assembly and stability. In cyanobacteria, loss of function mutation in this gene increases PSII/PSI ratio without any influence on photoautotrophic growth. | chrC:59772-60326 FORWARDmoderately similar to ( 283) YCF4_TOBAC Photosystem I assembly protein ycf4 - Nicotiana tabacum (Common tobacco)mod…	Photosystem I assembly protein ycf4
Photosystem I	solyc12g032990.1	1.79	weakly similar to ( 183) ATCG00340 | Symbols: PSAB | Encodes the D1 subunit of photosystem I and II reaction centers. | chrC:37375-39579 REVERSEweakly similar to ( 183) PSAB_MAIZE Photosystem I P700 chlorophyll a apoprotein A2 (PsaB) (PSI-B) - Zea mays (Maize)weakly similar to ( 183) loc_osp1g00330 11562.m00022 protein photosystem I P700 apoprotein A2psaB PsaA_PsaB psaA evidence_code:10F0H1E0IEG …	Photosystem I P700 chlorophyll a apoprotein A2; Photosystem I psaA and psaB
Photosystem I	solyc06g009950.1	1.67	very weakly similar to (99.0) ATCG00340 | Symbols: PSAB | Encodes the D1 subunit of photosystem I and II reaction centers. | chrC:37375-39579 REVERSEvery weakly similar to (99.0) PSAB_ATRBE Photosystem I P700 chlorophyll a apoprotein A2 (PsaB) (PSI-B) - Atropa belladonna (Belladonna) (Deadly nightshade)very weakly similar to (96.7) loc_osp1g00330 11562.m00022 protein photosystem I P700 apoprotein…	Photosystem I P700 chlorophyll a apoprotein A2; Photosystem I psaA and psaB
Photosystem I	solyc12g033050.1	1.66	moderately similar to ( 219) ATCG00340 | Symbols: PSAB | Encodes the D1 subunit of photosystem I and II reaction centers. | chrC:37375-39579 REVERSEmoderately similar to ( 224) PSAB_ATRBE Photosystem I P700 chlorophyll a apoprotein A2 (PsaB) (PSI-B) - Atropa belladonna (Belladonna) (Deadly nightshade)moderately similar to ( 216) loc_osp1g00330 11562.m00022 protein photosystem I P700 apoprotein A2…	Photosystem I P700 chlorophyll a apoprotein A2; Photosystem I psaA and psaB
Photosystem I	solyc05g020010.1	1.63	weakly similar to ( 182) ATCG00340 | Symbols: PSAB | Encodes the D1 subunit of photosystem I and II reaction centers. | chrC:37375-39579 REVERSEweakly similar to ( 182) PSAB_ATRBE Photosystem I P700 chlorophyll a apoprotein A2 (PsaB) (PSI-B) - Atropa belladonna (Belladonna) (Deadly nightshade)weakly similar to ( 179) loc_osp1g00330 11562.m00022 protein photosystem I P700 apoprotein A2psaB PsaA_Ps…	Photosystem I P700 chlorophyll a apoprotein A2; Photosystem I psaA and psaB
Photosystem I	solyc12g033060.1	1.61	moderately similar to ( 469) ATCG00340 | Symbols: PSAB | Encodes the D1 subunit of photosystem I and II reaction centers. | chrC:37375-39579 REVERSEmoderately similar to ( 471) PSAB_ANTMA Photosystem I P700 chlorophyll a apoprotein A2 (PsaB) (PSI-B) - Antirrhinum majus (Garden snapdragon)moderately similar to ( 466) loc_osp1g00330 11562.m00022 protein photosystem I P700 apoprotein A2psaB PsaA_Psa…	Photosystem I P700 chlorophyll a apoprotein A2; Photosystem I psaA and psaB
Photosystem I	solyc12g032980.1	1.57	weakly similar to ( 189) ATCG00340 | Symbols: PSAB | Encodes the D1 subunit of photosystem I and II reaction centers. | chrC:37375-39579 REVERSEmoderately similar to ( 206) PSAB_ATRBE Photosystem I P700 chlorophyll a apoprotein A2 (PsaB) (PSI-B) - Atropa belladonna (Belladonna) (Deadly nightshade)weakly similar to ( 192) loc_osp1g00330 11562.m00022 protein photosystem I P700 apoprotein A2psaB Psa…	Photosystem I P700 chlorophyll a apoprotein A2; Photosystem I psaA and psaB
Photosystem I	solyc02g036320.1	1.47	weakly similar to ( 102) ATCG00340 | Symbols: PSAB | Encodes the D1 subunit of photosystem I and II reaction centers. | chrC:37375-39579 REVERSEweakly similar to ( 102) PSAB_MAIZE Photosystem I P700 chlorophyll a apoprotein A2 (PsaB) (PSI-B) - Zea mays (Maize)weakly similar to ( 102) loc_osp1g00330 11562.m00022 protein photosystem I P700 apoprotein A2psaB PsaA_PsaB evidence_code:10F0H1E0IEG genom…	Photosystem I P700 chlorophyll a apoprotein
Photosystem I	solyc09g015320.1	1.43	weakly similar to ( 170) ATCG00350 | Symbols: PSAA | Encodes psaA protein comprising the reaction center for photosystem I along with psaB protein; hydrophobic protein encoded by the chloroplast genome. | chrC:39605-41857 REVERSEweakly similar to ( 174) PSAA_PANGI Photosystem I P700 chlorophyll a apoprotein A1 (PsaA) (PSI-A) - Panax ginseng (Korean ginseng)weakly similar to ( 166) loc_osp1g00340 …	Photosystem I P700 chlorophyll a apoprotein A1; Photosystem I psaA and psaB
Photosystem I	solyc09g063130.2	-1.09	weakly similar to ( 102) AT2G20260 | Symbols: PSAE-2 | PSAE-2 (photosystem I subunit E-2); catalytic | chr2:8736780-8737644 FORWARDweakly similar to ( 133) PSAEB_NICSY Photosystem I reaction center subunit IV B, chloroplast precursor (PSI-E B) [Contains: Photosystem I reaction center subunit IV B isoform 2] - Nicotiana sylvestris (Wood tobacco)very weakly similar to (97.4) loc_os07g25430 12007.m2…	Photosystem I reaction center subunit IV A
Classification	ID	Log(FC)	ITAG	Description
Photosystem II	solyc01g007500.2	1.89	highly similar to ( 994) ATCG00680 | Symbols: PSBB | encodes for CP47, subunit of the photosystem II reaction center. | chrC:72371-73897 FORWARDnearly identical (1001) PSBB_TOBAC Photosystem II P680 chlorophyll A apoprotein (CP-47 protein) - Nicotiana tabacum (Common tobacco)highly similar to ( 971) loc_osp1g00600 11562.m00051 protein photosystem II 47 kDa proteinpsbB PSII genomic_reference:SL2.4…	Photosystem II CP47 chlorophyll apoprotein; Photosystem II, PsbB
Photosystem II	solyc01g007520.2	1.89	weakly similar to ( 123) ATCG00710 | Symbols: PSBH | Encodes a 8 kD phosphoprotein that is a component of the photosystem II oxygen evolving core. Its exact molecular function has not been determined but it may play a role in mediating electron transfer between the secondary quinone acceptors, QA and QB, associated with the acceptor side of PSII. | chrC:74485-74706 FORWARDweakly similar to ( 131)…	Photosystem II reaction center protein H ;Photosystem II phosphoprotein PsbH
Photosystem II	solyc11g013780.1	1.88	very weakly similar to (99.0) ATCG00020 | Symbols: PSBA | Encodes chlorophyll binding protein D1, a part of the photosystem II reaction center core | chrC:383-1444 REVERSEvery weakly similar to (99.4) PSBA_NEPOL Photosystem Q(B) protein (32 kDa thylakoid membrane protein) (Photosystem II protein D1) - Nephroselmis olivaceavery weakly similar to (99.4) loc_os04g16730 12004.m06850 protein photosyst…	Photosystem Q(B) protein; Photosynthetic reaction centre, L/M
Photosystem II	solyc09g031730.1	1.84	weakly similar to ( 120) ATCG00270 | Symbols: PSBD | PSII D2 protein | chrC:32711-33772 FORWARDweakly similar to ( 120) PSBD_PINTH Photosystem II D2 protein (Photosystem Q(A) protein) (PSII D2 protein) - Pinus thunbergii (Green pine) (Japanese black pine)weakly similar to ( 124) loc_os01g58040 12001.m11951 protein photosystem II D2 protein, putative, expressedpsbD evidence_code:10F0H1E0IEG genomi…	Photosystem II D2 protein; Photosynthetic reaction centre, L/M
Photosystem II	solyc09g055950.1	1.81	moderately similar to ( 226) ATCG00270 | Symbols: PSBD | PSII D2 protein | chrC:32711-33772 FORWARDmoderately similar to ( 230) PSBD_ANTFO Photosystem II D2 protein (Photosystem Q(A) protein) (PSII D2 protein) - Anthoceros formosae (Hornwort)moderately similar to ( 228) loc_osp1g00170 11562.m00006 protein photosystem II protein D2psbD Photo_RC psbA evidence_code:10F0H1E0IEG genomic_reference:SL2.…	Photosystem II D2 protein; Photosynthetic reaction centre, L/M
Photosystem II	solyc05g016120.1	1.8	moderately similar to ( 238) ATCG00020 | Symbols: PSBA | Encodes chlorophyll binding protein D1, a part of the photosystem II reaction center core | chrC:383-1444 REVERSEmoderately similar to ( 238) PSBA_OENHO Photosystem Q(B) protein (32 kDa thylakoid membrane protein) (Photosystem II protein D1) (PSII D1 protein) - Oenothera hookeri (Hookers evening primrose)moderately similar to ( 253) loc_os1…	Photosystem Q(B) protein ; Photosynthetic reaction centre, L/M
Photosystem II	solyc11g045260.1	1.79	weakly similar to ( 145) ATCG00280 | Symbols: PSBC | chloroplast gene encoding a CP43 subunit of the photosystem II reaction center. promoter contains a blue-light responsive element. | chrC:33720-35141 FORWARDweakly similar to ( 145) PSBC_SPIOL Photosystem II 44 kDa reaction center protein precursor (P6 protein) (CP43) - Spinacia oleracea (Spinach)weakly similar to ( 144) loc_osp1g00180 11562.m0…	Photosystem II CP43 chlorophyll apoprotein; Photosystem antenna protein-like
Photosystem II	solyc01g048590.1	1.69	weakly similar to ( 122) ATCG00020 | Symbols: PSBA | Encodes chlorophyll binding protein D1, a part of the photosystem II reaction center core | chrC:383-1444 REVERSEweakly similar to ( 122) PSBA_NEPOL Photosystem Q(B) protein (32 kDa thylakoid membrane protein) (Photosystem II protein D1) - Nephroselmis olivaceaweakly similar to ( 122) loc_os08g35420 12008.m07531 protein photosystem Q, putative,…	Photosystem Q(B) proteinPhotosynthetic reaction centre, L/M
Photosystem II	solyc10g047410.1	1.69	moderately similar to ( 236) ATCG00280 | Symbols: PSBC | chloroplast gene encoding a CP43 subunit of the photosystem II reaction center. promoter contains a blue-light responsive element. | chrC:33720-35141 FORWARDmoderately similar to ( 239) PSBC_TOBAC Photosystem II 44 kDa reaction center protein (P6 protein) (CP43) - Nicotiana tabacum (Common tobacco)moderately similar to ( 238) loc_osp1g00180…	Photosystem II CP43 chlorophyll apoprotein; Photosystem antenna protein-like
Photosystem II	solyc11g056340.1	1.62	weakly similar to ( 119) ATCG00020 | Symbols: PSBA | Encodes chlorophyll binding protein D1, a part of the photosystem II reaction center core | chrC:383-1444 REVERSEweakly similar to ( 120) PSBA_VICFA Photosystem Q(B) protein (32 kDa thylakoid membrane protein) (Photosystem II protein D1) - Vicia faba (Broad bean)weakly similar to ( 119) loc_os10g21200 12010.m05138 protein photosystem Q, putativ…	Photosystem Q(B) protein; Photosynthetic reaction centre, L/M
Photosystem II	solyc02g011990.1	1.57	moderately similar to ( 292) ATCG00020 | Symbols: PSBA | Encodes chlorophyll binding protein D1, a part of the photosystem II reaction center core | chrC:383-1444 REVERSEmoderately similar to ( 295) PSBA_MARPO Photosystem Q(B) protein (32 kDa thylakoid membrane protein) (Photosystem II protein D1) - Marchantia polymorpha (Liverwort)moderately similar to ( 291) loc_os10g21200 12010.m05138 protein …	Photosystem Q(B) protein ; Photosynthetic reaction centre, L/M
Photosystem II	solyc11g050770.1	1.55	very weakly similar to (80.9) PSBZ_PANGI Photosystem II reaction center protein Z (PSII-Z) - Panax ginseng (Korean ginseng)psbZ evidence_code:10F0H0E0IEG genomic_reference:SL2.40ch11 gene_region:41130598-41130843 transcript_region:SL2.40ch11:41130598..41130843- go_terms:GO:0009539 functional_description:"Photosystem II reaction center protein Z (AHRD V1 ***- Q5IHA1_9SOLN); contains Interpro domai…	Photosystem II reaction center protein Z; Photosystem II protein PsbZ
Photosystem II	solyc10g061830.1	1.53	weakly similar to ( 106) ATCG00280 | Symbols: PSBC | chloroplast gene encoding a CP43 subunit of the photosystem II reaction center. promoter contains a blue-light responsive element. | chrC:33720-35141 FORWARDweakly similar to ( 112) PSBC_MARPO Photosystem II 44 kDa reaction center protein (P6 protein) (CP43) - Marchantia polymorpha (Liverwort)weakly similar to ( 112) loc_osp1g00180 11562.m00007…	Photosystem II CP43 chlorophyll apoprotein ; Photosystem antenna protein-like
Photosystem II	solyc12g039030.1	1.51	weakly similar to ( 102) ATCG00020 | Symbols: PSBA | Encodes chlorophyll binding protein D1, a part of the photosystem II reaction center core | chrC:383-1444 REVERSEweakly similar to ( 102) PSBA_MESVI Photosystem Q(B) protein (32 kDa thylakoid membrane protein) (Photosystem II protein D1) - Mesostigma virideweakly similar to ( 102) loc_os08g35420 12008.m07531 protein photosystem Q, putative, exp…	Photosystem Q(B) protein; Photosynthetic reaction centre, L/M
Photosystem II	solyc01g044250.1	1.5	weakly similar to ( 129) ATCG00280 | Symbols: PSBC | chloroplast gene encoding a CP43 subunit of the photosystem II reaction center. promoter contains a blue-light responsive element. | chrC:33720-35141 FORWARDweakly similar to ( 131) PSBC_TOBAC Photosystem II 44 kDa reaction center protein (P6 protein) (CP43) - Nicotiana tabacum (Common tobacco)weakly similar to ( 124) loc_osp1g00180 11562.m0000…	Photosystem II CP43 chlorophyll apoprotein ; Photosystem antenna protein-like
Photosystem II	solyc05g021190.1	1.45	weakly similar to ( 118) ATCG00270 | Symbols: PSBD | PSII D2 protein | chrC:32711-33772 FORWARDweakly similar to ( 120) PSBD_NEPOL Photosystem II D2 protein (Photosystem Q(A) protein) (PSII D2 protein) - Nephroselmis olivaceaweakly similar to ( 123) loc_os01g58040 12001.m11951 protein photosystem II D2 protein, putative, expressedpsbD evidence_code:10F0H1E0IEG genomic_reference:SL2.40ch05 gene_re…	Photosystem II D2 protein
Photosystem II	solyc12g027550.1	1.39	very weakly similar to (95.1) ATCG00280 | Symbols: PSBC | chloroplast gene encoding a CP43 subunit of the photosystem II reaction center. promoter contains a blue-light responsive element. | chrC:33720-35141 FORWARDvery weakly similar to (96.3) PSBC_TOBAC Photosystem II 44 kDa reaction center protein (P6 protein) (CP43) - Nicotiana tabacum (Common tobacco)very weakly similar to (90.9) loc_osp1g00…	Photosystem II CP43 chlorophyll apoprotein; Photosystem antenna protein-like
Photosystem II	solyc10g017940.1	1.32	moderately similar to ( 293) ATCG00280 | Symbols: PSBC | chloroplast gene encoding a CP43 subunit of the photosystem II reaction center. promoter contains a blue-light responsive element. | chrC:33720-35141 FORWARDmoderately similar to ( 298) PSBC_LOTJA Photosystem II 44 kDa reaction center protein (P6 protein) (CP43) - Lotus japonicusmoderately similar to ( 280) loc_osp1g00180 11562.m00007 prote…	Photosystem II CP43 chlorophyll apoprotein; Photosystem antenna protein-like
Photosystem II	solyc12g038080.1	1.29	weakly similar to ( 142) ATCG00280 | Symbols: PSBC | chloroplast gene encoding a CP43 subunit of the photosystem II reaction center. promoter contains a blue-light responsive element. | chrC:33720-35141 FORWARDweakly similar to ( 142) PSBC_TOBAC Photosystem II 44 kDa reaction center protein (P6 protein) (CP43) - Nicotiana tabacum (Common tobacco)weakly similar to ( 137) loc_osp1g00180 11562.m0000…	Photosystem II CP43 chlorophyll apoprotein; Photosystem antenna protein-like
Photosystem II	solyc02g021290.1	1.18	very weakly similar to (83.6) ATCG00020 | Symbols: PSBA | Encodes chlorophyll binding protein D1, a part of the photosystem II reaction center core | chrC:383-1444 REVERSEvery weakly similar to (84.0) PSBA_MARPO Photosystem Q(B) protein (32 kDa thylakoid membrane protein) (Photosystem II protein D1) - Marchantia polymorpha (Liverwort)very weakly similar to (83.6) loc_os08g35420 12008.m07531 prote…	Photosystem Q(B) protein; Photosynthetic reaction centre, L/M
Photosystem II	solyc07g062730.1	-1.431		Chloroplast protein HCF243
Classification	ID	Log(FC)	ITAG	Description
Chlorphyll biosynthesis	solyc10g006900.2	-1.18	highly similar to ( 598) AT5G54190 | Symbols: PORA | PORA; oxidoreductase/ protochlorophyllide reductase | chr5:21991183-21992238 REVERSEhighly similar to ( 615) POR_DAUCA Protochlorophyllide reductase, chloroplast precursor (EC 1.3.1.33) (PCR) (NADPH-protochlorophyllide oxidoreductase) (POR) - Daucus carota (Carrot)highly similar to ( 563) loc_os10g35370 12010.m06361 protein protochlorophyllide …	Light-dependent protochlorophyllide reductase
Chlorphyll biosynthesis	solyc12g013710.1	-1.24	highly similar to ( 598) AT5G54190 | Symbols: PORA | PORA; oxidoreductase/ protochlorophyllide reductase | chr5:21991183-21992238 REVERSEhighly similar to ( 604) POR_DAUCA Protochlorophyllide reductase, chloroplast precursor (EC 1.3.1.33) (PCR) (NADPH-protochlorophyllide oxidoreductase) (POR) - Daucus carota (Carrot)highly similar to ( 553) loc_os10g35370 12010.m06361 protein protochlorophyllide …	Light-dependent protochlorophyllide reductase
Chlorphyll biosynthesis	solyc12g005300.1	-1.27	weakly similar to ( 184) AT5G43860 | Symbols: ATCLH2, CLH2 | ATCLH2; chlorophyllase | chr5:17630492-17632184 FORWARDweakly similar to ( 153) CLH1_CITSI Chlorophyllase-1, chloroplast precursor (EC 3.1.1.14) (Chlorophyll-chlorophyllido hydrolase 1) (Chlase 1) - Citrus sinensis (Sweet orange)weakly similar to ( 147) loc_os10g28370 12010.m05717 protein chlorophyllase-2, chloroplast precursor, putativ…	Chlorophyllase 2
Classification	ID	Log(FC)	ITAG	Description
Ferredoxin	solyc01g103920.2	2.89	weakly similar to ( 142) AT1G60950 | Symbols: FED A, ATFD2 | FED A; 2 iron, 2 sulfur cluster binding / electron carrier/ iron-sulfur cluster binding | chr1:22444565-22445011 FORWARDweakly similar to ( 194) FER_CAPAN Ferredoxin, chloroplast precursor (PFLP) - Capsicum annuum (Bell pepper)weakly similar to ( 124) loc_os08g01380 12008.m080056 protein ferredoxin-1, chloroplast precursor, putative, ex…	Ferredoxin I; Ferredoxin [2Fe-2S]
Classification	ID	Log(FC)	ITAG	Description
Cytochrome b	solyc01g007530.2	1.47	moderately similar to ( 394) ATCG00720 | Symbols: PETB | Encodes the cytochrome b(6) subunit of the cytochrome b6f complex. | chrC:74841-76292 FORWARDmoderately similar to ( 400) CYB6_ATRBE Cytochrome b6 - Atropa belladonna (Belladonna) (Deadly nightshade)moderately similar to ( 394) loc_osp1g00640 11562.m00055 protein cytochrome b6 petB PRK03735 Cytochrome_b_N Cytochrom_B_N QcrB genomic_referenc…	Cytochrome b6 ; Cytochrome b/b6, N-terminal
Cytochrome b	solyc01g007540.2	1.03	moderately similar to ( 246) ATCG00730 | Symbols: PETD | A chloroplast gene encoding subunit IV of the cytochrome b6/f complex | chrC:76481-77672 FORWARDmoderately similar to ( 251) PETD_NYMAL Cytochrome b6-f complex subunit 4 (17 kDa polypeptide) - Nymphaea alba (White water-lily)moderately similar to ( 244) loc_os01g57941 12001.m150407 protein cytochrome b6-f complex subunit 4, putative, expres…	Cytochrome b6-f complex subunit 4; Cytochrome b6/f complex, subunit IV
Classification	ID	Log(FC)	ITAG	Description
MDH	solyc03g115990.1	1.55	highly similar to ( 535) AT3G47520 | Symbols: MDH | MDH (MALATE DEHYDROGENASE); L-malate dehydrogenase/ binding / catalytic/ malate dehydrogenase/ oxidoreductase/ oxidoreductase, acting on the CH-OH group of donors, NAD or NADP as acceptor | chr3:17513657-17514868 FORWARDmoderately similar to ( 393) MDHG_ORYSA Malate dehydrogenase, glyoxysomal precursor (EC 1.1.1.37) - Oryza sativa (Rice)highly s…	NADP Malate dehydrogenase chloroplastic
Classification	ID	Log(FC)	ITAG	Description
Calvin cycle	solyc02g067750.2	3.07	moderately similar to ( 354) AT3G01500 | Symbols: CA1 | CA1 (CARBONIC ANHYDRASE 1); carbonate dehydratase/ zinc ion binding | chr3:195173-197873 REVERSEmoderately similar to ( 394) CAHC_TOBAC Carbonic anhydrase, chloroplast precursor (EC 4.2.1.1) (Carbonate dehydratase) - Nicotiana tabacum (Common tobacco)moderately similar to ( 252) loc_os01g45274 12001.m150428 protein carbonic anhydrase, chloro…	Carbonic anhydrase chloroplastic stroma
Calvin cycle	solyc01g007330.2	2.24	highly similar to ( 922) ATCG00490 | Symbols: RBCL | large subunit of RUBISCO. Protein is tyrosine-phosphorylated and its phosphorylation state is modulated in response to ABA in Arabidopsis thaliana seeds. | chrC:54958-56397 FORWARDhighly similar to ( 972) RBL_TOBAC Ribulose bisphosphate carboxylase large chain precursor (EC 4.1.1.39) (RuBisCO large subunit) - Nicotiana tabacum (Common tobacco)h…	Ribulose bisphosphate carboxylase large chain; Rubisco
Classification	ID	Log(FC)	ITAG	Description
CEF	solyc12g033070.1	1.71	weakly similar to ( 146) ATCG01010 | Symbols: NDHF | Chloroplast encoded NADH dehydrogenase unit. | chrC:110398-112638 REVERSEmoderately similar to ( 228) NU5C_TOBAC NAD(P)H-quinone oxidoreductase chain 5, chloroplast (EC 1.6.5.-) (NAD(P)H dehydrogenase, chain 5) (NADH-plastoquinone oxidoreductase chain 5) - Nicotiana tabacum (Common tobacco)weakly similar to ( 140) loc_osp1g00330 11562.m00022 pr…	NADH dehydrogenase subunit 5; Photosystem I psaA and psaB
Classification	ID	Log(FC)	ITAG	Description
Glycolysis/Gluconeogenesis unlclear	solyc08g077180.2	1.03	highly similar to ( 770) AT1G32440 | Symbols: PKp3 | PKp3 (plastidial pyruvate kinase 3); pyruvate kinase | chr1:11712205-11714963 FORWARDhighly similar to ( 934) KPYG_TOBAC Pyruvate kinase isozyme G, chloroplast precursor (EC 2.7.1.40) - Nicotiana tabacum (Common tobacco)highly similar to ( 762) loc_os10g42100 12010.m06967 protein pyruvate kinase isozyme G, chloroplast precursor, putative, expre…	Pyruvate kinase
Glycolysis/Gluconeogenesis unlclear	solyc07g065900.2	-1.15	highly similar to ( 598) AT4G26530 | Symbols: | fructose-bisphosphate aldolase, putative | chr4:13391566-13392937 FORWARDhighly similar to ( 594) ALF1_PEA Fructose-bisphosphate aldolase, cytoplasmic isozyme 1 (EC 4.1.2.13) - Pisum sativum (Garden pea)highly similar to ( 561) loc_os06g40640 12006.m091735 protein fructose-bisphosphate aldolase, cytoplasmic isozyme 1, putative, expressed Glycolytic …	Fructose-bisphosphate aldolase (chloroplast)
Glycolysis/Gluconeogenesis unlclear	solyc04g071340.2	-1.7	highly similar to ( 593) AT1G43670 | Symbols: | fructose-1,6-bisphosphatase, putative / D-fructose-1,6-bisphosphate 1-phosphohydrolase, putative / FBPase, putative | chr1:16468184-16470347 FORWARDhighly similar to ( 667) F16P2_SOLTU Fructose-1,6-bisphosphatase, cytosolic (EC 3.1.3.11) (D-fructose-1,6-bisphosphate 1-phosphohydrolase) (FBPase) (CY-F1) - Solanum tuberosum (Potato)highly similar to (…	Fructose-1 6-bisphosphatase class 1

## Sheet: Protein
Classification	ID	Log(FC)	ITAG	Description
Protein synthesis	solyc01g007470.1	3.1	weakly similar to ( 114) ATCG00660 | Symbols: RPL20 | encodes a chloroplast ribosomal protein L20, a constituent of the large subunit of the ribosomal complex | chrC:68512-68865 REVERSEweakly similar to ( 152) RK20_PANGI Chloroplast 50S ribosomal protein L20 - Panax ginseng (Korean ginseng)very weakly similar to (86.7) loc_osp1g00580 11562.m00049 protein ribosomal protein L20 rpl20 Ribosomal_L20 …	50S ribosomal protein L20 chloroplastic
Protein synthesis	solyc01g007600.2	2.46	weakly similar to ( 193) ATCG00790 | Symbols: RPL16 | chloroplast gene encoding a ribosomal protein L16, which is a constituent of 50S large ribosomal subunit | chrC:81189-82652 REVERSEmoderately similar to ( 206) RK16_ATRBE Chloroplast 50S ribosomal protein L16 - Atropa belladonna (Belladonna) (Deadly nightshade)weakly similar to ( 184) loc_osp1g00720 11562.m00063 protein ribosomal protein L16 r…	50S ribosomal protein L16 chloroplastic
Protein synthesis	solyc01g007610.2	1.57	moderately similar to ( 370) ATCG00800 | Symbols: | encodes a chloroplast ribosomal protein S3, a constituent of the small subunit of the ribosomal complex | chrC:82826-83482 REVERSEmoderately similar to ( 405) RR3_SOLTU Chloroplast 30S ribosomal protein S3 - Solanum tuberosum (Potato)moderately similar to ( 269) loc_os09g24409 12009.m059911 protein chloroplast 30S ribosomal protein S3, putative,…	30S ribosomal protein S3 chloroplastic
Protein synthesis	solyc11g056360.1	1.39	weakly similar to ( 198) ATMG00980 | Symbols: RPSL2 | ribosomal protein L2 | chrM:260224-260601 REVERSEmoderately similar to ( 209) RT12_PETHY Mitochondrial ribosomal protein S12 - Petunia hybrida (Petunia)weakly similar to ( 187) loc_osm1g00290 11706.m00023 protein Ribosomal protein S12 rpsL Ribosomal_S12 Ribosomal_S12 rps12 RpsL evidence_code:10F0H1E1IEG genomic_reference:SL2.40ch11 gene_region…	30S ribosomal protein S12
Classification	ID	Log(FC)	ITAG	Description
Protein modification	solyc07g041940.2	1.27	highly similar to ( 538) AT2G05940 | Symbols: | protein kinase, putative | chr2:2287514-2289270 REVERSEmoderately similar to ( 232) NORK_PEA Nodulation receptor kinase precursor (EC 2.7.11.1) - Pisum sativum (Garden pea)moderately similar to ( 482) loc_os03g08170 12003.m06326 protein protein kinase APK1B, chloroplast precursor, putative, expressed TyrKc Pkinase_Tyr PTKc S_TKc S_TKc Pkinase PTKc_J…	ATP binding / serine-threonine kinase
Protein modification	solyc07g018200.1	1.87	moderately similar to ( 477) AT5G57500 | Symbols: | transferase, transferring glycosyl groups | chr5:23286406-23287525 REVERSEmoderately similar to ( 297) loc_os02g54370 12002.m10466 protein hypro1, putative, expressed evidence_code:10F0H1E0IEG genomic_reference:SL2.40ch07 gene_region:9698942-9699901 transcript_region:SL2.40ch07:9698942..9699901+ go_terms:GO:0016020 functional_description:"UDP-Gl…	UDP-GlcNAc:betaGal beta-1,3-N-acetylglucosaminyltransferase 5
Protein modification	solyc05g009010.1	1.13	moderately similar to ( 360) AT1G25390 | Symbols: | protein kinase family protein | chr1:8906640-8908800 REVERSEweakly similar to ( 187) NORK_PEA Nodulation receptor kinase precursor (EC 2.7.11.1) - Pisum sativum (Garden pea)moderately similar to ( 363) loc_os01g04409 12001.m07075 protein OsWAK1 - OsWAK receptor-like cytoplasmic kinase (OsWAK-RLCK), expressed S_TKc S_TKc Pkinase_Tyr Pkinase PTKc …	Serine/threonine protein kinase family protein
Protein modification	solyc07g049560.2	1.1	moderately similar to ( 290) AT1G05000 | Symbols: | tyrosine specific protein phosphatase family protein | chr1:1425660-1428393 FORWARDmoderately similar to ( 260) loc_os06g10650 12006.m05783 protein tyrosine specific protein phosphatase family protein, putative, expressed Y_phosphatase2 genomic_reference:SL2.40ch07 gene_region:57175525-57179154 transcript_region:SL2.40ch07:57175525..57179154- go…	Tyrosine phosphatase family protein
Protein modification	solyc11g007250.1	-1.03	moderately similar to ( 449) AT3G44610 | Symbols: | protein kinase family protein | chr3:16188266-16192107 REVERSEmoderately similar to ( 413) G11A_ORYSA Protein kinase G11A (EC 2.7.11.1) - Oryza sativa (Rice)moderately similar to ( 430) loc_os11g05320 12011.m04730 protein protein kinase PVPK-1, putative, expressed S_TKc S_TKc Pkinase SPS1 Pkinase_Tyr PTKc TyrKc evidence_code:10F0H1E0IEG genomic_…	Protein kinase like protein
Protein modification	solyc04g071120.2	-1.14	moderately similar to ( 477) AT4G38470 | Symbols: | protein kinase family protein | chr4:17999432-18003551 FORWARDweakly similar to ( 108) NORK_MEDTR Nodulation receptor kinase precursor (EC 2.7.11.1) (Does not make infections protein 2) (Symbiosis receptor-like kinase) (MtSYMRK) - Medicago truncatula (Barrel medic)highly similar to ( 580) loc_os12g06670 12012.m04657 protein ATP binding protein, …	Serine/threonine/tyrosine kinase
Protein modification	solyc06g073090.2	-1.6	moderately similar to ( 318) AT5G24490 | Symbols: | 30S ribosomal protein, putative | chr5:8365690-8367178 FORWARDmoderately similar to ( 307) RR30_SPIOL Plastid-specific 30S ribosomal protein 1, chloroplast precursor (PSRP-1) (CS-S5) (CS5) (S22) (Ribosomal protein 1) - Spinacia oleracea (Spinach)moderately similar to ( 266) loc_os03g63950 12003.m35647 protein plastid-specific 30S ribosomal prote…	Ribosomal subunit interface protein
Protein modification	solyc01g111880.2	-2.08	highly similar to ( 716) AT4G38470 | Symbols: | protein kinase family protein | chr4:17999432-18003551 FORWARDweakly similar to ( 127) NORK_MEDTR Nodulation receptor kinase precursor (EC 2.7.11.1) (Does not make infections protein 2) (Symbiosis receptor-like kinase) (MtSYMRK) - Medicago truncatula (Barrel medic)highly similar to ( 716) loc_os09g37230 12009.m22182 protein ATP binding protein, puta…	Tyrosine-protein kinase transforming protein Src
Protein modification	solyc09g007420.2	-2.09	moderately similar to ( 366) AT2G37090 | Symbols: IRX9 | IRX9 (IRREGULAR XYLEM 9); transferase, transferring glycosyl groups / xylosyltransferase | chr2:15587671-15589223 REVERSEmoderately similar to ( 226) loc_os03g17850 12003.m07210 protein beta3-glucuronyltransferase, putative, expressed GlcAT-I Glyco_transf_43 genomic_reference:SL2.40ch09 gene_region:990503-994261 transcript_region:SL2.40ch09…	Galactosylgalactosylxylosylprotein 3-beta-glucuronosyltransferase 1
Classification	ID	Log(FC)	ITAG	Description
Proteolysis	solyc11g068880.1	2.49	Aspartic proteinase nepenthesin-2 - Peptidase A1	Aspartic proteinase nepenthesin-2
Proteolysis	solyc12g010020.1	2.39	highly similar to ( 607) AT4G30920 | Symbols: | cytosol aminopeptidase family protein | chr4:15046589-15049304 REVERSEhighly similar to ( 864) AMPL_SOLTU Leucine aminopeptidase, chloroplast precursor (EC 3.4.11.1) (LAP) (Leucyl aminopeptidase) (Proline aminopeptidase) (EC 3.4.11.5) (Prolyl aminopeptidase) - Solanum tuberosum (Potato)highly similar to ( 579) loc_os02g55140 12002.m10540 protein leu…	Leucyl aminopeptidase
Proteolysis	solyc08g076970.2	2.25	highly similar to ( 613) AT4G17830 | Symbols: | peptidase M20/M25/M40 family protein | chr4:9915916-9918049 FORWARDhighly similar to ( 554) loc_os02g46520 12002.m09689 protein acetylornithine deacetylase, putative, expressed PRK08651 Peptidase_M20 ArgE PRK08588 PRK07522 PRK13013 PRK09133 genomic_reference:SL2.40ch08 gene_region:58078222-58080829 transcript_region:SL2.40ch08:58078222..58080829- go…	Acetylornithine deacetylase or succinyl-diaminopimelate desuccinylase
Proteolysis	solyc06g083050.2	2.24	highly similar to ( 698) AT4G12910 | Symbols: scpl20 | scpl20 (serine carboxypeptidase-like 20); serine-type carboxypeptidase | chr4:7550576-7553051 REVERSEhighly similar to ( 683) CBP1_HORVU Serine carboxypeptidase 1 precursor (EC 3.4.16.5) (Serine carboxypeptidase I) (Carboxypeptidase C) (CP-MI) [Contains: Serine carboxypeptidase 1 chain A (Serine carboxypeptidase I chain A); Serine carboxypept…	Serine carboxypeptidase 1
Proteolysis	solyc08g079900.1	2.18	highly similar to ( 527) AT5G67360 | Symbols: ARA12 | ARA12; serine-type endopeptidase | chr5:26872192-26874465 REVERSEhighly similar to ( 578) loc_os10g38080 12010.m06590 protein subtilisin-like protease precursor, putative, expressedPA_subtilisin_like Peptidase_S8 evidence_code:10F0H1E1IEG genomic_reference:SL2.40ch08 gene_region:60493717-60495963 transcript_region:SL2.40ch08:60493717..60495963…	Subtilisin-like protease
Proteolysis	solyc06g071830.2	2.17	moderately similar to ( 348) AT5G63160 | Symbols: BT1 | BT1 (BTB AND TAZ DOMAIN PROTEIN 1); protein binding / transcription regulator | chr5:25333485-25335399 REVERSEmoderately similar to ( 231) loc_os01g66890 12001.m43320 protein protein binding protein, putative, expressed genomic_reference:SL2.40ch06 gene_region:40635147-40639478 transcript_region:SL2.40ch06:40635147..40639478- go_terms:GO:003…	BTB/POZ domain-containing protein
Proteolysis	solyc12g010030.1	2.06	very weakly similar to (92.8) AT2G24200 | Symbols: | cytosol aminopeptidase | chr2:10287017-10289450 REVERSEweakly similar to ( 122) AMPL_SOLTU Leucine aminopeptidase, chloroplast precursor (EC 3.4.11.1) (LAP) (Leucyl aminopeptidase) (Proline aminopeptidase) (EC 3.4.11.5) (Prolyl aminopeptidase) - Solanum tuberosum (Potato)very weakly similar to ( 100) loc_os02g55140 12002.m10540 protein leucine …	Leucyl aminopeptidase
Proteolysis	solyc01g007050.1	1.9	moderately similar to ( 299) AT3G11840 | Symbols: PUB24 | PUB24 (PLANT U-BOX 24); binding / ubiquitin-protein ligase | chr3:3736578-3738250 REVERSEvery weakly similar to (90.1) SPL11_ORYSA Spotted leaf protein 11 (Spotted leaf11) (Cell death-related protein SPL11) - Oryza sativa (Rice)moderately similar to ( 231) loc_os04g58920 12004.m10772 protein ubiquitin-protein ligase, putative, expressed ev…	U-box domain-containing protein 24
Proteolysis	solyc04g082120.2	1.85	nearly identical (1074) AT1G76140 | Symbols: | serine-type endopeptidase/ serine-type peptidase | chr1:28571187-28574852 FORWARDnearly identical (1029) loc_os01g01830 12001.m06826 protein prolyl endopeptidase, putative, expressed COG1505 Peptidase_S9_N PtrB Peptidase_S9 PRK10115 DAP2 genomic_reference:SL2.40ch04 gene_region:63497736-63502187 transcript_region:SL2.40ch04:63497736..63502187+ go_ter…	Prolyl endopeptidase
Proteolysis	solyc11g068940.1	1.62	moderately similar to ( 278) AT3G11840 | Symbols: PUB24 | PUB24 (PLANT U-BOX 24); binding / ubiquitin-protein ligase | chr3:3736578-3738250 REVERSEvery weakly similar to (80.1) SPL11_ORYSA Spotted leaf protein 11 (Spotted leaf11) (Cell death-related protein SPL11) - Oryza sativa (Rice)moderately similar to ( 264) loc_os04g58920 12004.m10772 protein ubiquitin-protein ligase, putative, expressed ev…	U-box domain-containing protein 24
Proteolysis	solyc01g103660.2	1.59	highly similar to ( 529) AT1G34340 | Symbols: | esterase/lipase/thioesterase family protein | chr1:12530936-12534031 FORWARDhighly similar to ( 561) loc_os01g65070 12001.m43304 protein embryogenesis-associated protein EMB8, putative, expressed COG0429 PRK10985 genomic_reference:SL2.40ch01 gene_region:83970532-83977332 transcript_region:SL2.40ch01:83970532..83977332+ go_terms:GO:0003824 functional…	Alpha/beta hydrolase fold
Proteolysis	solyc04g008100.1	1.58	moderately similar to ( 303) AT5G37490 | Symbols: | U-box domain-containing protein | chr5:14887744-14889051 FORWARDweakly similar to ( 112) SPL11_ORYSA Spotted leaf protein 11 (Spotted leaf11) (Cell death-related protein SPL11) - Oryza sativa (Rice)moderately similar to ( 333) loc_os03g13740 12003.m06818 protein immediate-early fungal elicitor protein CMPG1, putative, expressedUbox evidence_code…	U-box domain-containing protein
Proteolysis	solyc03g115040.2	1.18	moderately similar to ( 401) AT1G03220 | Symbols: | extracellular dermal glycoprotein, putative / EDGP, putative | chr1:787143-788444 FORWARDmoderately similar to ( 266) 7SBG2_SOYBN Basic 7S globulin 2 precursor (Bg) (SBg7S) [Contains: Basic 7S globulin 2 high kDa subunit; Basic 7S globulin 2 low kDa subunit] - Glycine max (Soybean)moderately similar to ( 370) loc_os05g33400 12005.m07572 protein …	Xylanase inhibitor
Proteolysis	solyc03g006210.1	1.17	moderately similar to ( 330) AT3G49340 | Symbols: | cysteine proteinase, putative | chr3:18293347-18294577 REVERSEmoderately similar to ( 279) CYSEP_PHAVU Vignain precursor (EC 3.4.22.-) (Bean endopeptidase) (Cysteine proteinase EP-C1) - Phaseolus vulgaris (Kidney bean) (French bean)moderately similar to ( 322) loc_os12g17540 12012.m05711 protein vignain precursor, putative Peptidase_C1 Peptidase…	Cathepsin B-like cysteine proteinase
Proteolysis	solyc04g081890.1	1.15	weakly similar to ( 115) AT5G42200 | Symbols: | zinc finger (C3HC4-type RING finger) family protein | chr5:16860523-16861014 FORWARD evidence_code:10F1H1E1IEG genomic_reference:SL2.40ch04 gene_region:63347131-63347535 transcript_region:SL2.40ch04:63347131..63347535+ go_terms:GO:0004842 functional_description:"Ring H2 finger protein (AHRD V1 *-*- D9ZHD8_HYPPE); contains Interpro domain(s) IPR01895…	Ring H2 finger protein
Proteolysis	solyc08g079870.1	1.03	highly similar to ( 515) AT1G04110 | Symbols: SDD1 | SDD1 (STOMATAL DENSITY AND DISTRIBUTION); serine-type endopeptidase | chr1:1061457-1063784 REVERSEhighly similar to ( 577) loc_os10g38080 12010.m06590 protein subtilisin-like protease precursor, putative, expressedPA_subtilisin_like Peptidase_S8 evidence_code:10F1H1E1IEG genomic_reference:SL2.40ch08 gene_region:60466441-60468678 transcript_regi…	Subtilisin-like protease
Proteolysis	solyc06g054540.2	-1.04	moderately similar to ( 414) AT5G18650 | Symbols: | zinc finger (C3HC4-type RING finger) family protein | chr5:6218260-6220374 FORWARDmoderately similar to ( 320) loc_os12g35320 12012.m07325 protein RING finger and CHY zinc finger domain-containing protein 1, putative, expressed genomic_reference:SL2.40ch06 gene_region:33776420-33780993 transcript_region:SL2.40ch06:33776420..33780993- go_terms:GO…	CHY zinc finger family protein expressed
Proteolysis	solyc09g083130.2	-1.05	highly similar to ( 844) AT4G14570 | Symbols: | acylaminoacyl-peptidase-related | chr4:8362586-8366525 FORWARDhighly similar to ( 843) loc_os10g28020 12010.m065265 protein acylamino-acid-releasing enzyme, putative, expressed DAP2 Peptidase_S9 genomic_reference:SL2.40ch09 gene_region:64201580-64208191 transcript_region:SL2.40ch09:64201580..64208191- go_terms:GO:0004252 functional_description:"Pept…	Peptidase S9 prolyl oligopeptidase active site domain protein
Proteolysis	solyc09g082760.2	-1.08	highly similar to ( 506) AT1G11910 | Symbols: | aspartyl protease family protein | chr1:4017119-4019874 REVERSEhighly similar to ( 508) ASPR1_ORYSA Aspartic proteinase oryzasin-1 precursor (EC 3.4.23.-) - Oryza sativa (Rice)highly similar to ( 508) loc_os05g49200 12005.m27639 protein aspartic proteinase oryzasin-1 precursor, putative, expressed Asp genomic_reference:SL2.40ch09 gene_region:6383713…	Aspartic proteinase 2
Proteolysis	solyc02g076690.2	-1.12	moderately similar to ( 352) AT1G09850 | Symbols: XBCP3 | XBCP3 (xylem bark cysteine peptidase 3); cysteine-type endopeptidase/ cysteine-type peptidase | chr1:3201848-3203875 FORWARDmoderately similar to ( 335) ORYA_ORYSA Oryzain alpha chain precursor (EC 3.4.22.-) - Oryza sativa (Rice)moderately similar to ( 340) loc_os05g43230 12005.m08451 protein cysteine proteinase RD21a precursor, putative, …	Cathepsin B-like cysteine proteinase
Proteolysis	solyc01g087060.2	-1.34	moderately similar to ( 215) AT3G63530 | Symbols: BB, BB2 | BB (BIG BROTHER); protein binding / ubiquitin-protein ligase/ zinc ion binding | chr3:23456407-23457787 REVERSEmoderately similar to ( 207) loc_os03g07790 12003.m06291 protein protein binding protein, putative, expressed genomic_reference:SL2.40ch01 gene_region:73754738-73759711 transcript_region:SL2.40ch01:73754738..73759711- go_terms:G…	Ring-h2 finger protein
Proteolysis	solyc04g079070.2	-1.37	moderately similar to ( 459) AT2G23000 | Symbols: scpl10 | scpl10 (serine carboxypeptidase-like 10); serine-type carboxypeptidase | chr2:9792284-9795741 FORWARDmoderately similar to ( 310) CBP1_HORVU Serine carboxypeptidase 1 precursor (EC 3.4.16.5) (Serine carboxypeptidase I) (Carboxypeptidase C) (CP-MI) [Contains: Serine carboxypeptidase 1 chain A (Serine carboxypeptidase I chain A); Serine car…	Serine carboxypeptidase 1
Proteolysis	solyc12g015800.1	-1.49	moderately similar to ( 356) AT5G55970 | Symbols: | zinc finger (C3HC4-type RING finger) family protein | chr5:22668019-22669312 FORWARDmoderately similar to ( 293) loc_os01g50750 12001.m11256 protein protein binding protein, putative, expressed evidence_code:10F0H1E1IEG genomic_reference:SL2.40ch12 gene_region:5801485-5804137 transcript_region:SL2.40ch12:5801485..5804137- go_terms:GO:0008270 fun…	RING finger family protein
Proteolysis	solyc07g065810.2	-1.65	moderately similar to ( 370) AT5G55970 | Symbols: | zinc finger (C3HC4-type RING finger) family protein | chr5:22668019-22669312 FORWARDmoderately similar to ( 310) loc_os01g50750 12001.m11256 protein protein binding protein, putative, expressed genomic_reference:SL2.40ch07 gene_region:64647606-64649101 transcript_region:SL2.40ch07:64647606..64649101+ go_terms:GO:0008270 functional_description:"R…	RING finger family protein
Proteolysis	solyc01g081210.2	-1.69	moderately similar to ( 261) AT1G31350 | Symbols: | F-box family protein | chr1:11221519-11222706 REVERSEmoderately similar to ( 209) loc_os06g49750 12006.m09499 protein expressed protein genomic_reference:SL2.40ch01 gene_region:73006448-73008180 transcript_region:SL2.40ch01:73006448..73008180- functional_description:"F-box/kelch-repeat protein At1g22040 (AHRD V1 ***- FBK8_ARATH); contains Interp…	F-box/kelch-repeat protein
Proteolysis	solyc12g087940.1	-1.87	moderately similar to ( 490) AT1G09750 | Symbols: | chloroplast nucleoid DNA-binding protein-related | chr1:3157541-3158960 FORWARDmoderately similar to ( 370) loc_os03g08790 12003.m06385 protein aspartic proteinase nepenthesin-1 precursor, putative, expressed evidence_code:10F0H1E1IEG genomic_reference:SL2.40ch12 gene_region:61882046-61884187 transcript_region:SL2.40ch12:61882046..61884187- go_t…	Aspartic proteinase nepenthesin-1
Proteolysis	solyc01g106820.2	-1.98	highly similar to ( 732) AT1G17870 | Symbols: ATEGY3, EGY3 | EGY3 (ETHYLENE-DEPENDENT GRAVITROPISM-DEFICIENT AND YELLOW-GREEN-LIKE 3) | chr1:6150036-6152185 REVERSEhighly similar to ( 705) loc_os03g51920 12003.m10171 protein peptidase, M50 family, putative, expressed genomic_reference:SL2.40ch01 gene_region:86331805-86335838 transcript_region:SL2.40ch01:86331805..86335838+ functional_description:…	Peptidase M50 family
Proteolysis	solyc12g005020.1	-2.58	weakly similar to ( 136) AT3G20395 | Symbols: | protein binding / zinc ion binding | chr3:7112020-7113792 REVERSEweakly similar to ( 125) loc_os10g39770 12010.m06748 protein RING-H2 finger protein ATL2B, putative, expressed evidence_code:10F0H0E0IEG genomic_reference:SL2.40ch12 gene_region:10618-11752 transcript_region:SL2.40ch12:10618..11752- go_terms:GO:0005141 functional_description:"Ring H2 f…	Ring H2 finger protein (chloroplast)

## Sheet: Secondary metabolites
Classification	ID	Log(FC)	ITAG	Description
Secondary metabolites	solyc02g093180.2	2.16	moderately similar to ( 373) AT5G67150 | Symbols: | transferase family protein | chr5:26795880-26797226 REVERSEvery weakly similar to (89.0) HCBT2_DIACA Anthranilate N-benzoyltransferase protein 2 (EC 2.3.1.144) (Anthranilate N-hydroxycinnamoyl/benzoyltransferase 2) - Dianthus caryophyllus (Carnation) (Clove pink)moderately similar to ( 316) loc_os08g02020 12008.m04350 protein conserved hypotheti…	N-hydroxycinnamoyl/benzoyltransferase 3
Secondary metabolites	solyc06g073080.2	2.11	moderately similar to ( 451) AT5G24530 | Symbols: DMR6 | DMR6 (DOWNY MILDEW RESISTANT 6); oxidoreductase/ oxidoreductase, acting on paired donors, with incorporation or reduction of molecular oxygen, 2-oxoglutarate as one donor, and incorporation of one atom each of oxygen into both donors | chr5:8378964-8383154 FORWARDmoderately similar to ( 204) FL3H_MALDO Naringenin,2-oxoglutarate 3-dioxygenas…	Flavonol synthase/flavanone 3-hydroxylase
Secondary metabolites	solyc02g089770.2	1.93	moderately similar to ( 233) AT5G14700 | Symbols: | cinnamoyl-CoA reductase-related | chr5:4740502-4743327 REVERSEweakly similar to ( 109) DFRA_VITVI Dihydroflavonol-4-reductase (EC 1.1.1.219) (DFR) (Dihydrokaempferol 4-reductase) - Vitis vinifera (Grape)moderately similar to ( 258) loc_os01g45200 12001.m10725 protein dihydroflavonol-4-reductase, putative, expressed genomic_reference:SL2.40ch02 g…	Dihydroflavonol-4-reductase
Secondary metabolites	solyc01g011430.2	1.84	moderately similar to ( 457) AT3G49210 | Symbols: | unknown protein | chr3:18238216-18241161 REVERSEmoderately similar to ( 406) loc_os05g48260 12005.m08897 protein expressed proteinDUF1298 genomic_reference:SL2.40ch01 gene_region:9218936-9221367 transcript_region:SL2.40ch01:9218936..9221367- functional_description:"Diacylglycerol O-acyltransferase (AHRD V1 ***- A5UWY0_ROSS1); contains Interpro d…	Diacylglycerol O-acyltransferase (AHRD V1 ***- A5UWY0_ROSS1); contains Interpro domain(s) IPR009721 Protein of unknown function DUF1298
Secondary metabolites	solyc02g079490.2	1.68	moderately similar to ( 494) AT1G32910 | Symbols: | transferase family protein | chr1:11925426-11926908 FORWARDvery weakly similar to (99.4) HCBT3_DIACA Anthranilate N-benzoyltransferase protein 3 (EC 2.3.1.144) (Anthranilate N-hydroxycinnamoyl/benzoyltransferase 3) - Dianthus caryophyllus (Carnation) (Clove pink)moderately similar to ( 318) loc_os04g51980 12004.m10093 protein transferase, putati…	Hydroxycinnamoyl-CoA shikimate/quinate hydroxycinnamoyl transferase
Secondary metabolites	solyc06g074710.1	1.63	moderately similar to ( 214) AT5G48930 | Symbols: HCT | HCT (HYDROXYCINNAMOYL-COA SHIKIMATE/QUINATE HYDROXYCINNAMOYL TRANSFERASE); quinate O-hydroxycinnamoyltransferase/ shikimate O-hydroxycinnamoyltransferase/ transferase | chr5:19836654-19838092 REVERSEweakly similar to ( 182) HCBT1_DIACA Anthranilate N-benzoyltransferase protein 1 (EC 2.3.1.144) (Anthranilate N-hydroxycinnamoyl/benzoyltransfer…	Hydroxycinnamoyl CoA shikimate/quinate hydroxycinnamoyltransferase-like
Secondary metabolites	solyc02g083860.2	1.57	highly similar to ( 600) AT3G51240 | Symbols: F3H, TT6, F3H | F3H (FLAVANONE 3-HYDROXYLASE); naringenin 3-dioxygenase | chr3:19025409-19026658 FORWARDhighly similar to ( 641) FL3H_PETHY Naringenin,2-oxoglutarate 3-dioxygenase (EC 1.14.11.9) (Flavonone-3-hydroxylase) (F3H) (FHT) (Fragment) - Petunia hybrida (Petunia)highly similar to ( 549) loc_os04g56700 12004.m10557 protein naringenin,2-oxogluta…	Flavanone 3-hydroxylase
Secondary metabolites	solyc03g080180.2	1.5	highly similar to ( 565) AT5G54160 | Symbols: ATOMT1, OMT1 | ATOMT1 (O-METHYLTRANSFERASE 1); caffeate O-methyltransferase/ myricetin 3-O-methyltransferase/ quercetin 3-O-methyltransferase | chr5:21982075-21984167 FORWARDhighly similar to ( 677) COMT1_CAPAN Caffeic acid 3-O-methyltransferase (EC 2.1.1.68) (S-adenosysl-L-methionine:caffeic acid 3-O-methyltransferase) (COMT) (CAOMT) - Capsicum annuu…	O-methyltransferase
Secondary metabolites	solyc10g052490.1	1.48	moderately similar to ( 414) AT4G39230 | Symbols: | isoflavone reductase, putative | chr4:18266024-18267604 REVERSEmoderately similar to ( 500) IFRH_SOLTU Isoflavone reductase homolog (EC 1.3.1.-) (CP100) - Solanum tuberosum (Potato)moderately similar to ( 366) loc_os06g27770 12006.m07322 protein isoflavone reductase, putative, expressedNmrA evidence_code:10F1H1E1IEG genomic_reference:SL2.40ch10 …	Isoflavone reductase-like protein 5
Secondary metabolites	solyc10g083440.1	1.46	moderately similar to ( 395) AT5G17050 | Symbols: UGT78D2 | UGT78D2 (UDP-GLUCOSYL TRANSFERASE 78D2); UDP-glycosyltransferase/ anthocyanidin 3-O-glucosyltransferase/ quercetin 3-O-glucosyltransferase/ transferase, transferring glycosyl groups | chr5:5607828-5609392 REVERSEhighly similar to ( 625) UFOG_SOLME Anthocyanidin 3-O-glucosyltransferase (EC 2.4.1.115) (Flavonol 3-O-glucosyltransferase) (UD…	UDP flavonoid 3-O-glucosyltransferase
Secondary metabolites	solyc10g086180.1	1.45	nearly identical (1153) AT3G53260 | Symbols: PAL2, ATPAL2 | PAL2; phenylalanine ammonia-lyase | chr3:19744256-19746619 REVERSEnearly identical (1325) PAL2_TOBAC Phenylalanine ammonia-lyase (EC 4.3.1.5) - Nicotiana tabacum (Common tobacco)nearly identical (1073) loc_os04g43800 12004.m09339 protein phenylalanine ammonia-lyase, putative, expressed PAL PAL-HAL HutH PRK09367 evidence_code:10F0H1E1IEG …	Phenylalanine ammonia-lyase
Secondary metabolites	solyc01g107080.2	1.39	moderately similar to ( 292) AT5G67150 | Symbols: | transferase family protein | chr5:26795880-26797226 REVERSEweakly similar to ( 115) HCBT1_DIACA Anthranilate N-benzoyltransferase protein 1 (EC 2.3.1.144) (Anthranilate N-hydroxycinnamoyl/benzoyltransferase 1) - Dianthus caryophyllus (Carnation) (Clove pink)moderately similar to ( 256) loc_os08g01950 12008.m04343 protein expressed proteinTransfe…	Hydroxycinnamoyl transferase
Secondary metabolites	solyc10g038080.1	1.39	moderately similar to ( 464) AT3G06350 | Symbols: EMB3004, MEE32 | MEE32 (MATERNAL EFFECT EMBRYO ARREST 32); 3-dehydroquinate dehydratase/ NADP or NADPH binding / binding / catalytic/ shikimate 5-dehydrogenase | chr3:1924536-1927701 REVERSEmoderately similar to ( 444) loc_os01g27750 12001.m09223 protein shikimate biosynthesis protein aroDE, putative, expressed AroE aroE aroDE PRK12548 PRK12549 DH…	Shikimate dehydrogenase
Secondary metabolites	solyc08g080040.2	1.35	highly similar to ( 508) AT4G22880 | Symbols: LDOX, TDS4, TT18, ANS | LDOX (LEUCOANTHOCYANIDIN DIOXYGENASE); leucocyanidin oxygenase | chr4:12004905-12006059 REVERSEhighly similar to ( 606) LDOX_PETHY Leucoanthocyanidin dioxygenase (EC 1.14.11.19) (LDOX) (Leucocyanidin oxygenase) (Leucoanthocyanidin hydroxylase) - Petunia hybrida (Petunia)moderately similar to ( 357) loc_os01g27490 12001.m09199 p…	Anthocyanidin synthase
Secondary metabolites	solyc12g094460.1	1.27	highly similar to ( 803) AT1G76160 | Symbols: sks5 | sks5 (SKU5 Similar 5); copper ion binding / oxidoreductase | chr1:28578211-28581020 REVERSEhighly similar to ( 537) ASO_BRANA L-ascorbate oxidase homolog precursor (EC 1.10.3.3) (Ascorbase) - Brassica napus (Rape)highly similar to ( 721) loc_os06g46500 12006.m09176 protein L-ascorbate oxidase homolog precursor, putative, expressed Cu-oxidase Cu…	Laccase-2
Secondary metabolites	solyc02g085020.2	1.25	moderately similar to ( 477) AT5G42800 | Symbols: DFR, TT3, M318 | DFR (DIHYDROFLAVONOL 4-REDUCTASE); dihydrokaempferol 4-reductase | chr5:17164296-17165864 REVERSEhighly similar to ( 692) DFRA_PETHY Dihydroflavonol-4-reductase (EC 1.1.1.219) (DFR) (Dihydrokaempferol 4-reductase) - Petunia hybrida (Petunia)moderately similar to ( 305) loc_os01g44260 12001.m10683 protein dihydroflavonol-4-reductas…	Dihydroflavonol 4-reductase
Secondary metabolites	solyc09g091510.2	1.23	highly similar to ( 654) AT5G13930 | Symbols: CHS, TT4, ATCHS | TT4 (TRANSPARENT TESTA 4); naringenin-chalcone synthase | chr5:4488762-4490035 FORWARDhighly similar to ( 753) CHSB_SOLTU Chalcone synthase 1B (EC 2.3.1.74) (Naringenin-chalcone synthase 1B) - Solanum tuberosum (Potato)highly similar to ( 672) loc_os11g32650 12011.m07166 protein chalcone synthase, putative, expressedChal_sti_synt_N C…	Chalcone synthase; Polyketide synthase, type III
Secondary metabolites	solyc09g059170.1	1.21	moderately similar to ( 219) AT5G54010 | Symbols: | glycosyltransferase family protein | chr5:21919819-21921180 REVERSEmoderately similar to ( 434) UFOG_PETHY Anthocyanidin 3-O-glucosyltransferase (EC 2.4.1.115) (Flavonol 3-O-glucosyltransferase) (UDP-glucose flavonoid 3-O-glucosyltransferase) (Anthocyanin rhamnosyl transferase) - Petunia hybrida (Petunia)moderately similar to ( 275) loc_os11g273…	Anthocyanidin 3-O-glucosyltransferase
Secondary metabolites	solyc08g061480.2	1.19	moderately similar to ( 371) AT2G26310 | Symbols: | chalcone isomerase | chr2:11201770-11203919 FORWARDmoderately similar to ( 348) loc_os02g53810 12002.m10410 protein expressed protein genomic_reference:SL2.40ch08 gene_region:45975801-45982039 transcript_region:SL2.40ch08:45975801..45982039+ go_terms:GO:0042398 functional_description:"Chalcone isomerase (AHRD V1 *-*- B6TFR7_MAIZE); contains Inte…	Chalcone isomerase
Secondary metabolites	solyc11g011340.1	1.19	moderately similar to ( 435) AT4G39330 | Symbols: ATCAD9, CAD9 | CAD9 (CINNAMYL ALCOHOL DEHYDROGENASE 9); binding / catalytic/ oxidoreductase/ zinc ion binding | chr4:18291268-18292740 FORWARDhighly similar to ( 514) MTDH_FRAAN Probable mannitol dehydrogenase (EC 1.1.1.255) (NAD-dependent mannitol dehydrogenase) - Fragaria ananassa (Strawberry)moderately similar to ( 392) loc_os10g29470 12010.m05…	Alcohol dehydrogenase
Secondary metabolites	solyc08g083190.2	1.19	highly similar to ( 530) AT1G64670 | Symbols: BDG1 | BDG1 (BODYGUARD1); hydrolase | chr1:24030990-24033474 REVERSEhighly similar to ( 545) loc_os10g38860 12010.m06653 protein catalytic/ hydrolase, putative, expressed MhpC Abhydrolase_1 genomic_reference:SL2.40ch08 gene_region:62889499-62892318 transcript_region:SL2.40ch08:62889499..62892318- functional_description:"Hydrolase alpha/beta fold famil…	Hydrolase alpha/beta fold family protein expressed
Secondary metabolites	solyc04g072280.2	1.16	highly similar to ( 639) AT5G09360 | Symbols: LAC14 | LAC14 (laccase 14); laccase | chr5:2906426-2908658 REVERSEmoderately similar to ( 230) ASO_CUCSA L-ascorbate oxidase precursor (EC 1.10.3.3) (Ascorbase) (ASO) - Cucumis sativus (Cucumber)highly similar to ( 606) loc_os11g47390 12011.m08519 protein laccase, putative, expressed Cu-oxidase_3 SufI Cu-oxidase_2 Cu-oxidase genomic_reference:SL2.40ch…	Laccase
Secondary metabolites	solyc12g088170.1	1.14	weakly similar to ( 193) AT3G26040 | Symbols: | transferase family protein | chr3:9519741-9521069 FORWARDvery weakly similar to (89.7) loc_os08g10420 12008.m05175 protein anthranilate N-benzoyltransferase protein 1, putative, expressedTransferase evidence_code:10F1H1E1IEG genomic_reference:SL2.40ch12 gene_region:62063284-62065066 transcript_region:SL2.40ch12:62063284..62065066+ go_terms:GO:001674…	Hydroxycinnamoyl CoA quinate transferase; anthocyanin acyltransferase
Secondary metabolites	solyc05g010320.2	1.12	moderately similar to ( 261) AT3G55120 | Symbols: TT5, A11, CFI | TT5 (TRANSPARENT TESTA 5); chalcone isomerase | chr3:20430248-20431415 REVERSEmoderately similar to ( 337) CFIA_PETHY Chalcone--flavonone isomerase A (EC 5.5.1.6) (Chalcone isomerase A) - Petunia hybrida (Petunia)moderately similar to ( 265) loc_os03g60509 12003.m10939 protein expressed proteinChalcone genomic_reference:SL2.40ch05 …	Chalcone--flavonone isomerase
Secondary metabolites	solyc12g006510.1	1.08	nearly identical (1141) AT1G78950 | Symbols: | beta-amyrin synthase, putative | chr1:29684558-29688673 REVERSEhighly similar to ( 915) loc_os02g04710 12002.m33547 protein cycloartenol synthase, putative, expressed SQCY_1 SQCY SqhC ISOPREN_C2_like evidence_code:10F0H1E0IEG genomic_reference:SL2.40ch12 gene_region:1016976-1023578 transcript_region:SL2.40ch12:1016976..1023578+ go_terms:GO:0016866,GO…	Cycloartenol Synthase; Squalene cyclase
Secondary metabolites	solyc09g082660.2	1.07	moderately similar to ( 269) AT1G67980 | Symbols: CCOAMT | CCoAMT; caffeoyl-CoA O-methyltransferase | chr1:25488239-25488934 FORWARDmoderately similar to ( 250) CAMT_MEDSA Caffeoyl-CoA O-methyltransferase (EC 2.1.1.104) (Trans-caffeoyl-CoA 3-O-methyltransferase) (CCoAMT) (CCoAOMT) - Medicago sativa (Alfalfa)moderately similar to ( 246) loc_os06g06980 12006.m31989 protein caffeoyl-CoA O-methyltran…	Caffeoyl-CoA O-methyltransferase
Secondary metabolites	solyc03g031860.2	1.03	highly similar to ( 589) AT5G17230 | Symbols: | phytoene synthase (PSY) / geranylgeranyl-diphosphate geranylgeranyl transferase | chr5:5659839-5662087 REVERSEhighly similar to ( 740) PSY_CAPAN Phytoene synthase, chloroplast precursor (EC 2.5.1.-) - Capsicum annuum (Bell pepper)highly similar to ( 556) loc_os06g51290 12006.m31943 protein phytoene synthase, chloroplast precursor, putative, expresse…	Phytoene synthase 1
Secondary metabolites	solyc02g080670.2	1.02	highly similar to ( 831) AT4G22010 | Symbols: sks4 | sks4 (SKU5 Similar 4); copper ion binding / oxidoreductase | chr4:11663429-11666463 FORWARDhighly similar to ( 573) ASO_BRANA L-ascorbate oxidase homolog precursor (EC 1.10.3.3) (Ascorbase) - Brassica napus (Rape)highly similar to ( 807) loc_os06g46500 12006.m09176 protein L-ascorbate oxidase homolog precursor, putative, expressed Cu-oxidase_3 …	Laccase-22
Secondary metabolites	solyc12g007030.1	-1.07	highly similar to ( 703) AT3G24503 | Symbols: ALDH2C4, ALDH1A, REF1 | ALDH2C4; 3-chloroallyl aldehyde dehydrogenase/ aldehyde dehydrogenase (NAD)/ coniferyl-aldehyde dehydrogenase | chr3:8919732-8923029 REVERSEmoderately similar to ( 371) BADH_SPIOL Betaine-aldehyde dehydrogenase, chloroplast precursor (EC 1.2.1.8) (BADH) - Spinacia oleracea (Spinach)highly similar to ( 717) loc_os01g40860 12001.…	Aldehyde dehydrogenase 1
Secondary metabolites	solyc10g055730.1	-1.1	weakly similar to ( 138) AT5G67150 | Symbols: | transferase family protein | chr5:26795880-26797226 REVERSEweakly similar to ( 116) loc_os08g01950 12008.m04343 protein expressed protein evidence_code:10F0H1E0IEG genomic_reference:SL2.40ch10 gene_region:52762723-52763775 transcript_region:SL2.40ch10:52762723..52763775+ go_terms:GO:0016747 functional_description:"N-hydroxycinnamoyl/benzoyltransfera…	N-hydroxycinnamoyl/benzoyltransferase 4
Secondary metabolites	solyc06g066170.2	-1.11	moderately similar to ( 450) AT1G32100 | Symbols: ATPRR1, PRR1 | PRR1 (PINORESINOL REDUCTASE 1); pinoresinol reductase | chr1:11546472-11547953 REVERSEmoderately similar to ( 264) IFRH_SOLTU Isoflavone reductase homolog (EC 1.3.1.-) (CP100) - Solanum tuberosum (Potato)moderately similar to ( 479) loc_os12g16410 12012.m26884 protein isoflavone reductase, putative, expressedNmrA genomic_reference:S…	Pinoresinol-lariciresinol reductase; NmrA-like
Secondary metabolites	solyc12g039070.1	-1.11	moderately similar to ( 230) AT3G57030 | Symbols: | strictosidine synthase family protein | chr3:21101653-21103204 REVERSEmoderately similar to ( 205) STSY_CATRO Strictosidine synthase precursor (EC 4.3.3.2) - Catharanthus roseus (Rosy periwinkle) (Madagascar periwinkle)moderately similar to ( 212) loc_os09g20684 12009.m05275 protein strictosidine synthase 3 precursor, putative, expressed Str_syn…	Strictosidine synthase family protein
Secondary metabolites	solyc03g006550.2	-1.15	highly similar to ( 509) AT1G61120 | Symbols: TPS04, GES | TPS04 (TERPENE SYNTHASE 04); (E,E)-geranyllinalool synthase | chr1:22523689-22528598 FORWARDmoderately similar to ( 216) KSB_CUCMA Ent-kaurene synthase B, chloroplast precursor (EC 4.2.3.19) (KSB) - Cucurbita maxima (Pumpkin) (Winter squash)moderately similar to ( 210) loc_os04g52230 12004.m10118 protein ent-kaurene synthase B, chloroplas…	(-)-ent-kaurene synthase; Terpene synthase
Secondary metabolites	solyc02g085120.2	-1.27	highly similar to ( 824) AT5G03260 | Symbols: LAC11 | LAC11 (laccase 11); laccase | chr5:777198-779338 REVERSEmoderately similar to ( 219) ASO_CUCSA L-ascorbate oxidase precursor (EC 1.10.3.3) (Ascorbase) (ASO) - Cucumis sativus (Cucumber)highly similar to ( 795) loc_os01g44330 12001.m10689 protein L-ascorbate oxidase precursor, putative, expressed Cu-oxidase_3 Cu-oxidase Cu-oxidase_2 SufI genomi…	Laccase
Secondary metabolites	solyc01g068140.2	-1.31	moderately similar to ( 396) AT3G62160 | Symbols: | transferase family protein | chr3:23014333-23015808 REVERSEweakly similar to ( 126) HCBT2_DIACA Anthranilate N-benzoyltransferase protein 2 (EC 2.3.1.144) (Anthranilate N-hydroxycinnamoyl/benzoyltransferase 2) - Dianthus caryophyllus (Carnation) (Clove pink)moderately similar to ( 280) loc_os01g18744 12001.m08413 protein 3-N-debenzoyl-2-deoxytax…	10-deacetylbaccatin III-10-O-acetyl transferase-like
Secondary metabolites	solyc09g011960.1	-1.6	highly similar to ( 821) AT5G60020 | Symbols: LAC17, ATLAC17 | LAC17 (laccase 17); laccase | chr5:24168072-24170223 FORWARDweakly similar to ( 183) ASO_TOBAC L-ascorbate oxidase precursor (EC 1.10.3.3) (Ascorbase) (ASO) - Nicotiana tabacum (Common tobacco)highly similar to ( 778) loc_os01g62480 12001.m12370 protein L-ascorbate oxidase precursor, putative, expressed SufI Cu-oxidase_3 Cu-oxidase Cu…	Laccase
Secondary metabolites	solyc02g085110.2	-1.65	highly similar to ( 840) AT5G03260 | Symbols: LAC11 | LAC11 (laccase 11); laccase | chr5:777198-779338 REVERSEmoderately similar to ( 228) ASO_CUCSA L-ascorbate oxidase precursor (EC 1.10.3.3) (Ascorbase) (ASO) - Cucumis sativus (Cucumber)highly similar to ( 812) loc_os01g44330 12001.m10689 protein L-ascorbate oxidase precursor, putative, expressed Cu-oxidase_3 Cu-oxidase Cu-oxidase_2 SufI genomi…	Laccase
Secondary metabolites	solyc06g083470.2	-1.77	moderately similar to ( 335) AT5G06060 | Symbols: | tropinone reductase, putative / tropine dehydrogenase, putative | chr5:1824066-1825833 REVERSEweakly similar to ( 109) FABG4_BRANA 3-oxoacyl-[acyl-carrier-protein] reductase 4 (EC 1.1.1.100) (3-ketoacyl-acyl carrier protein reductase 4) (Fragment) - Brassica napus (Rape)moderately similar to ( 311) loc_os03g16220 12003.m101290 protein tropinone …	Tropinone reductase-like protein 16
Secondary metabolites	solyc09g014240.2	-1.78	highly similar to ( 861) AT2G38080 | Symbols: IRX12, LAC4 | IRX12 (IRREGULAR XYLEM 12); laccase | chr2:15934540-15937352 FORWARDmoderately similar to ( 224) ASO_CUCSA L-ascorbate oxidase precursor (EC 1.10.3.3) (Ascorbase) (ASO) - Cucumis sativus (Cucumber)highly similar to ( 792) loc_os11g48060 12011.m08604 protein monocopper oxidase-like protein SKS1 precursor, putative, expressed Cu-oxidase_3 …	Laccase 1a
Secondary metabolites	solyc03g114530.2	-1.84	moderately similar to ( 202) AT3G57030 | Symbols: | strictosidine synthase family protein | chr3:21101653-21103204 REVERSEweakly similar to ( 185) STSY_CATRO Strictosidine synthase precursor (EC 4.3.3.2) - Catharanthus roseus (Rosy periwinkle) (Madagascar periwinkle)weakly similar to ( 186) loc_os09g20684 12009.m05275 protein strictosidine synthase 3 precursor, putative, expressed Str_synth genom…	Strictosidine synthase family protein
Secondary metabolites	solyc08g074620.1	-2.282	nearly identical (1017) PPOB_SOLTU Catechol oxidase B, chloroplast precursor (EC 1.10.3.1) (Polyphenol oxidase) (PPO) (Fragment) - Solanum tuberosum (Potato)moderately similar to ( 357) loc_os04g53300 12004.m10221 protein polyphenol oxidase II, chloroplast precursor, putative, expressedTyrosinase evidence_code:10F1H1E1IEG genomic_reference:SL2.40ch08 gene_region:55911248-55913011 transcript_regio…	Polyphenol oxidase
Secondary metabolites	solyc03g114560.2	-2.34	moderately similar to ( 248) AT3G57030 | Symbols: | strictosidine synthase family protein | chr3:21101653-21103204 REVERSEmoderately similar to ( 201) STSY_CATRO Strictosidine synthase precursor (EC 4.3.3.2) - Catharanthus roseus (Rosy periwinkle) (Madagascar periwinkle)moderately similar to ( 221) loc_os08g34330 12008.m07422 protein strictosidine synthase 1 precursor, putative, expressed Str_syn…	Strictosidine synthase family protein
Secondary metabolites	solyc09g011000.2	-2.56	highly similar to ( 502) AT5G60020 | Symbols: LAC17, ATLAC17 | LAC17 (laccase 17); laccase | chr5:24168072-24170223 FORWARDweakly similar to ( 152) ASO_CUCMA L-ascorbate oxidase precursor (EC 1.10.3.3) (Ascorbase) (ASO) - Cucurbita maxima (Pumpkin) (Winter squash)moderately similar to ( 453) loc_os01g62480 12001.m12370 protein L-ascorbate oxidase precursor, putative, expressed Cu-oxidase_3 Cu-oxi…	Laccase
Secondary metabolites	solyc09g011050.2	-2.93	highly similar to ( 504) AT5G60020 | Symbols: LAC17, ATLAC17 | LAC17 (laccase 17); laccase | chr5:24168072-24170223 FORWARDweakly similar to ( 154) ASO_CUCMA L-ascorbate oxidase precursor (EC 1.10.3.3) (Ascorbase) (ASO) - Cucurbita maxima (Pumpkin) (Winter squash)moderately similar to ( 456) loc_os01g62480 12001.m12370 protein L-ascorbate oxidase precursor, putative, expressed Cu-oxidase_3 Cu-oxi…	Laccase
Secondary metabolites	solyc06g076330.2	-3.37	highly similar to ( 800) AT2G29130 | Symbols: LAC2, ATLAC2 | LAC2 (laccase 2); laccase | chr2:12525189-12527699 REVERSEmoderately similar to ( 211) ASO_TOBAC L-ascorbate oxidase precursor (EC 1.10.3.3) (Ascorbase) (ASO) - Nicotiana tabacum (Common tobacco)highly similar to ( 777) loc_os01g62490 12001.m12371 protein L-ascorbate oxidase precursor, putative, expressed Cu-oxidase_3 Cu-oxidase Cu-oxid…	Laccase

## Sheet: Misc
Classification	ID	Log(FC)	ITAG	Description
Misc	solyc01g108360.2	3.348	weakly similar to ( 142) AT2G15780 | Symbols: | glycine-rich protein | chr2:6873666-6874701 REVERSEweakly similar to ( 134) loc_os06g11310 12006.m05848 protein copper ion binding protein, putative, expressed genomic_reference:SL2.40ch01 gene_region:87458504-87459478 transcript_region:SL2.40ch01:87458504..87459478+ functional_description:"Copper ion binding protein (AHRD V1 **-- B6TG98_MAIZE); con…	Copper ion binding protein
Misc	solyc01g105350.1	2.43	highly similar to ( 523) AT1G22340 | Symbols: AtUGT85A7 | AtUGT85A7 (UDP-glucosyl transferase 85A7); UDP-glycosyltransferase/ glucuronosyltransferase/ transferase, transferring glycosyl groups | chr1:7890464-7892090 REVERSEweakly similar to ( 165) IAAG_MAIZE Indole-3-acetate beta-glucosyltransferase (EC 2.4.1.121) (IAA-Glu synthetase) ((Uridine 5-diphosphate-glucose:indol-3-ylacetyl)-beta-D-gluco…	UDP-glucuronosyltransferase
Misc	solyc09g092600.2	2.28	highly similar to ( 512) AT4G31500 | Symbols: CYP83B1, SUR2, RNT1, RED1, ATR4 | CYP83B1 (CYTOCHROME P450 MONOOXYGENASE 83B1); oxidoreductase, acting on paired donors, with incorporation or reduction of molecular oxygen, NADH or NADPH as one donor, and incorporation of one atom of oxygen / oxygen binding | chr4:15273677-15275271 REVERSEmoderately similar to ( 450) C71A9_SOYBN Cytochrome P450 71A9 …	Cytochrome P450
Misc	solyc05g050210.2	2.19	moderately similar to ( 481) AT4G01130 | Symbols: | acetylesterase, putative | chr4:485868-488007 FORWARDmoderately similar to ( 273) EST_HEVBR Esterase precursor (EC 3.1.1.-) (Early nodule-specific protein homolog) (Latex allergen Hev b 13) - Hevea brasiliensis (Para rubber tree)moderately similar to ( 466) loc_os06g06520 12006.m05377 protein esterase precursor, putative, expressedSGNH_plant_lip…	GDSL esterase/lipase At4g01130
Misc	solyc01g060020.2	1.93	moderately similar to ( 352) AT4G16260 | Symbols: | catalytic/ cation binding / hydrolase, hydrolyzing O-glycosyl compounds | chr4:9200180-9201441 REVERSEhighly similar to ( 641) E132_SOLTU Glucan endo-1,3-beta-glucosidase, basic isoform 2 precursor (EC 3.2.1.39) ((1->3)-beta-glucan endohydrolase) ((1->3)-beta-glucanase) (Beta-1,3-endoglucanase) - Solanum tuberosum (Potato)moderately similar to (…	Beta-glucanase
Misc	solyc09g009550.2	1.84	moderately similar to ( 437) AT2G36290 | Symbols: | hydrolase, alpha/beta fold family protein | chr2:15208867-15210768 REVERSEmoderately similar to ( 389) loc_os04g33590 12004.m08454 protein catalytic/ hydrolase, putative, expressed genomic_reference:SL2.40ch09 gene_region:2960891-2963265 transcript_region:SL2.40ch09:2960891..2963265- go_terms:GO:0016787 functional_description:"Hydrolase alpha/be…	Hydrolase alpha/beta fold family protein
Misc	solyc05g055290.2	1.777	moderately similar to ( 333) AT2G36290 | Symbols: | hydrolase, alpha/beta fold family protein | chr2:15208867-15210768 REVERSEmoderately similar to ( 322) loc_os02g32970 12002.m08390 protein catalytic/ hydrolase, putative, expressed genomic_reference:SL2.40ch05 gene_region:64133774-64136904 transcript_region:SL2.40ch05:64133774..64136904- go_terms:GO:0016787 functional_description:"Hydrolase alph…	Hydrolase alpha/beta fold family protein
Misc	solyc04g008330.1	1.77	weakly similar to ( 176) AT4G34131 | Symbols: UGT73B3 | UGT73B3 (UDP-glucosyl transferase 73B3); UDP-glycosyltransferase/ abscisic acid glucosyltransferase/ quercetin 3-O-glucosyltransferase/ transferase, transferring hexosyl groups | chr4:16343268-16344713 REVERSEmoderately similar to ( 404) ZOX_PHAVU Zeatin O-xylosyltransferase (EC 2.4.2.40) (Zeatin O-beta-D-xylosyltransferase) - Phaseolus vulg…	Glucosyltransferase
Misc	solyc06g083650.2	1.58	highly similar to ( 518) AT5G33370 | Symbols: | GDSL-motif lipase/hydrolase family protein | chr5:12602864-12604670 REVERSEweakly similar to ( 160) APG_BRANA Anter-specific proline-rich protein APG (Protein CEX) (Fragment) - Brassica napus (Rape)moderately similar to ( 491) loc_os02g40440 12002.m09130 protein anther-specific proline-rich protein APG precursor, putative, expressedSGNH_plant_lipase…	GDSL esterase/lipase At5g33370
Misc	solyc10g085870.1	1.57	highly similar to ( 565) AT2G36780 | Symbols: | UDP-glucoronosyl/UDP-glucosyl transferase family protein | chr2:15417618-15419108 REVERSEweakly similar to ( 181) ZOX_PHAVU Zeatin O-xylosyltransferase (EC 2.4.2.40) (Zeatin O-beta-D-xylosyltransferase) - Phaseolus vulgaris (Kidney bean) (French bean)moderately similar to ( 417) loc_os01g08110 12001.m07436 protein flavonol-3-O-glycoside-7-O-glucosyl…	UDP-glucosyltransferase family 1 protein
Misc	solyc10g078220.1	1.56	highly similar to ( 643) AT2G40890 | Symbols: CYP98A3 | CYP98A3 (cytochrome P450, family 98, subfamily A, polypeptide 3); monooxygenase/ p-coumarate 3-hydroxylase | chr2:17058291-17060532 REVERSEhighly similar to ( 626) C98A2_SOYBN Cytochrome P450 98A2 (EC 1.14.-.-) - Glycine max (Soybean)highly similar to ( 578) loc_os05g41440 12005.m27896 protein cytochrome P450 98A1, putative, expressed p450 C…	Cytochrome P450
Misc	solyc03g080180.2	1.5	highly similar to ( 565) AT5G54160 | Symbols: ATOMT1, OMT1 | ATOMT1 (O-METHYLTRANSFERASE 1); caffeate O-methyltransferase/ myricetin 3-O-methyltransferase/ quercetin 3-O-methyltransferase | chr5:21982075-21984167 FORWARDhighly similar to ( 677) COMT1_CAPAN Caffeic acid 3-O-methyltransferase (EC 2.1.1.68) (S-adenosysl-L-methionine:caffeic acid 3-O-methyltransferase) (COMT) (CAOMT) - Capsicum annuu…	O-methyltransferase (caffeic acid 3-O-methyltransferase )
Misc	solyc09g009220.2	1.491	weakly similar to ( 193) AT5G03670 | Symbols: | unknown protein | chr5:947311-949898 FORWARD genomic_reference:SL2.40ch09 gene_region:2593727-2598249 transcript_region:SL2.40ch09:2593727..2598249- functional_description:"Unknown Protein (AHRD V1)"	Unknown Protein
Misc	solyc07g049440.2	1.39	moderately similar to ( 446) AT2G04570 | Symbols: | GDSL-motif lipase/hydrolase family protein | chr2:1594747-1596129 FORWARDmoderately similar to ( 209) APG_BRANA Anter-specific proline-rich protein APG (Protein CEX) (Fragment) - Brassica napus (Rape)moderately similar to ( 363) loc_os09g04710 12009.m21966 protein anther-specific proline-rich protein APG precursor, putative, expressedSGNH_plant_…	GDSL esterase/lipase At2g04570
Misc	solyc09g009520.2	1.371	moderately similar to ( 461) AT2G36290 | Symbols: | hydrolase, alpha/beta fold family protein | chr2:15208867-15210768 REVERSEmoderately similar to ( 413) loc_os02g32970 12002.m08390 protein catalytic/ hydrolase, putative, expressed genomic_reference:SL2.40ch09 gene_region:2929991-2932883 transcript_region:SL2.40ch09:2929991..2932883- go_terms:GO:0016787 functional_description:"Hydrolase alpha/be…	Hydrolase alpha/beta fold family protein
Misc	solyc08g074970.1	1.37	highly similar to ( 607) AT4G19460 | Symbols: | glycosyl transferase family 1 protein | chr4:10610422-10611972 REVERSEhighly similar to ( 552) loc_os01g46430 12001.m10841 protein transferase, transferring glycosyl groups, putative, expressed RfaG Glycos_transf_1 evidence_code:10F0H1E1IEG genomic_reference:SL2.40ch08 gene_region:56269563-56271008 transcript_region:SL2.40ch08:56269563..56271008- go…	Glycosyl transferase group 1
Misc	solyc03g122350.2	1.33	moderately similar to ( 409) AT5G07990 | Symbols: TT7, CYP75B1, D501 | TT7 (TRANSPARENT TESTA 7); flavonoid 3-monooxygenase/ oxygen binding | chr5:2560437-2562859 FORWARDmoderately similar to ( 388) C75A1_PETHY Flavonoid 3',5'-hydroxylase 1 (EC 1.14.13.88) (F3'5'H) (Cytochrome P450 75A1) (CYPLXXVA1) - Petunia hybrida (Petunia)highly similar to ( 733) loc_os09g26960 12009.m05848 protein flavonoid …	Cytochrome P450
Misc	solyc10g045240.1	1.33	highly similar to ( 592) AT2G44480 | Symbols: BGLU17 | BGLU17 (BETA GLUCOSIDASE 17); catalytic/ cation binding / hydrolase, hydrolyzing O-glycosyl compounds | chr2:18360476-18363001 FORWARDmoderately similar to ( 435) BGLC_MAIZE Beta-glucosidase, chloroplast precursor (EC 3.2.1.21) (Gentiobiase) (Cellobiase) (Beta-D-glucoside glucohydrolase) - Zea mays (Maize)highly similar to ( 585) loc_os04g398…	Beta-glucosidase D4
Misc	solyc06g065530.2	1.29	moderately similar to ( 243) AT1G29670 | Symbols: | GDSL-motif lipase/hydrolase family protein | chr1:10375843-10377717 FORWARDweakly similar to ( 151) APG_BRANA Anter-specific proline-rich protein APG (Protein CEX) (Fragment) - Brassica napus (Rape)moderately similar to ( 321) loc_os06g36520 12006.m08188 protein anther-specific proline-rich protein APG precursor, putative, expressedSGNH_plant_li…	GDSL esterase/lipase At1g29670
Misc	solyc03g116700.2	1.26	very weakly similar to (90.1) AT5G20230 | Symbols: ATBCB, BCB | ATBCB (ARABIDOPSIS BLUE-COPPER-BINDING PROTEIN); copper ion binding / electron carrier | chr5:6826626-6827408 FORWARDvery weakly similar to (97.1) CPC_CUCSA Cucumber peeling cupredoxin (CPC) (Stellacyanin) - Cucumis sativus (Cucumber)very weakly similar to (84.0) loc_os09g29390 12009.m06090 protein blue copper protein precursor, puta…	Blue copper protein
Misc	solyc02g086700.2	1.246	moderately similar to ( 298) AT4G16260 | Symbols: | catalytic/ cation binding / hydrolase, hydrolyzing O-glycosyl compounds | chr4:9200180-9201441 REVERSEmoderately similar to ( 419) E13L_TOBAC Glucan endo-1,3-beta-glucosidase, acidic isoform GL153 precursor (EC 3.2.1.39) ((1->3)-beta-glucan endohydrolase) ((1->3)-beta-glucanase) (Beta-1,3-endoglucanase) - Nicotiana tabacum (Common tobacco)modera…	Beta-1 3-glucanase
Misc	solyc11g066580.1	1.23	moderately similar to ( 488) AT5G07990 | Symbols: TT7, CYP75B1, D501 | TT7 (TRANSPARENT TESTA 7); flavonoid 3-monooxygenase/ oxygen binding | chr5:2560437-2562859 FORWARDhighly similar to ( 901) C75A2_SOLME Flavonoid 3',5'-hydroxylase (EC 1.14.13.88) (F3'5'H) (Cytochrome P450 75A2) (CYPLXXVA2) (P-450EG1) - Solanum melongena (Eggplant) (Aubergine)highly similar to ( 553) loc_os03g25150 12003.m0785…	Cytochrome P450
Misc	solyc10g083700.2	1.17	moderately similar to ( 391) AT3G52970 | Symbols: CYP76G1 | CYP76G1; electron carrier/ heme binding / iron ion binding / monooxygenase/ oxygen binding | chr3:19641400-19643259 REVERSEhighly similar to ( 818) C76A2_SOLME Cytochrome P450 76A2 (EC 1.14.-.-) (CYPLXXVIA2) (P-450EG7) - Solanum melongena (Eggplant) (Aubergine)moderately similar to ( 338) loc_os03g14400 12003.m06880 protein cytochrome P4…	Cytochrome P450
Misc	solyc08g068730.1	1.148	weakly similar to ( 153) AT2G39030 | Symbols: | GCN5-related N-acetyltransferase (GNAT) family protein | chr2:16298260-16298946 FORWARDmoderately similar to ( 326) THT11_TOBAC Tyramine N-feruloyltransferase 4/11 (EC 2.3.1.110) (Hydroxycinnamoyl-CoA: tyramine N-hydroxycinnamoyltransferase) - Nicotiana tabacum (Common tobacco)weakly similar to ( 127) loc_os03g05710 12003.m06093 protein N-acetyltran…	N-acetyltransferase
Misc	solyc04g016200.1	1.11	weakly similar to ( 176) AT2G36770 | Symbols: | UDP-glucoronosyl/UDP-glucosyl transferase family protein | chr2:15415227-15416717 REVERSEmoderately similar to ( 447) ZOX_PHAVU Zeatin O-xylosyltransferase (EC 2.4.2.40) (Zeatin O-beta-D-xylosyltransferase) - Phaseolus vulgaris (Kidney bean) (French bean)moderately similar to ( 337) loc_os04g46980 12004.m09644 protein cis-zeatin O-glucosyltransferas…	UDP-glucosyltransferase HvUGT5876
Misc	solyc02g077220.2	1.11	moderately similar to ( 349) AT5G45920 | Symbols: | carboxylesterase/ hydrolase/ hydrolase, acting on ester bonds | chr5:18622822-18624677 FORWARDmoderately similar to ( 280) loc_os01g11570 12001.m07773 protein isoamyl acetate-hydrolyzing esterase, putative, expressed Isoamyl_acetate_hydrolase_like Lipase_GDSL SGNH_hydrolase_like_2 genomic_reference:SL2.40ch02 gene_region:36794632-36799697 transc…	Isoamyl acetate-hydrolyzing esterase; Lipase, GDSL
Misc	solyc02g089730.1	1.1	highly similar to ( 746) AT5G15870 | Symbols: | glycosyl hydrolase family 81 protein | chr5:5182641-5184878 REVERSEhighly similar to ( 682) loc_os09g21210 12009.m05328 protein beta-glucan elicitor receptor, putative, expressed Glyco_hydro_81 ACF2 evidence_code:10F0H1E1IEG genomic_reference:SL2.40ch02 gene_region:46043034-46045142 transcript_region:SL2.40ch02:46043034..46045142+ go_terms:GO:001679…	Endo-1 3-beta-glucanase
Misc	solyc03g078490.2	1.09	highly similar to ( 517) AT1G22340 | Symbols: AtUGT85A7 | AtUGT85A7 (UDP-glucosyl transferase 85A7); UDP-glycosyltransferase/ glucuronosyltransferase/ transferase, transferring glycosyl groups | chr1:7890464-7892090 REVERSEweakly similar to ( 164) IAAG_MAIZE Indole-3-acetate beta-glucosyltransferase (EC 2.4.1.121) (IAA-Glu synthetase) ((Uridine 5-diphosphate-glucose:indol-3-ylacetyl)-beta-D-gluco…	UDP-glucuronosyltransferase
Misc	solyc06g072160.2	1.07	highly similar to ( 569) AT5G24760 | Symbols: | alcohol dehydrogenase, putative | chr5:8495035-8497090 REVERSEmoderately similar to ( 420) ADH1_ORYSA Alcohol dehydrogenase 1 (EC 1.1.1.1) - Oryza sativa (Rice)highly similar to ( 560) loc_os02g42520 12002.m33422 protein alcohol dehydrogenase 1, putative, expressed AdhC Tdh AdhP tdh PRK10083 PRK09422 ADH_zinc_N Qor PRK10309 ADH_N genomic_reference:S…	Alcohol dehydrogenase 1
Misc	solyc01g090180.2	1.051	moderately similar to ( 340) AT4G15093 | Symbols: | catalytic LigB subunit of aromatic ring-opening dioxygenase family | chr4:8618454-8619472 FORWARDmoderately similar to ( 332) loc_os01g65690 12001.m12678 protein 4,5-DOPA dioxygenase extradiol, putative, expressedLigB COG3384 PRK10628 genomic_reference:SL2.40ch01 gene_region:75570063-75571164 transcript_region:SL2.40ch01:75570063..75571164- go_t…	Extradiol ring-cleavage dioxygenase class III protein subunit B
Misc	solyc07g008560.2	1.05	highly similar to ( 907) AT5G50400 | Symbols: ATPAP27, PAP27 | PAP27 (PURPLE ACID PHOSPHATASE 27); acid phosphatase/ protein serine/threonine phosphatase | chr5:20523575-20526231 REVERSEhighly similar to ( 561) NPP_HORVU Nucleotide pyrophosphatase/phosphodiesterase (EC 3.-.-.-) (Fragments) - Hordeum vulgare (Barley)highly similar to ( 850) loc_os08g41880 12008.m08166 protein nucleotide pyrophosph…	Purple acid phosphatase
Misc	solyc12g070080.1	1.05	weakly similar to ( 102) AT5G64440 | Symbols: AtFAAH | AtFAAH (Arabidopsis thaliana fatty acid amide hydrolase); N-(long-chain-acyl)ethanolamine deacylase/ amidase | chr5:25766229-25770260 FORWARDweakly similar to ( 194) loc_os11g06900 12011.m04887 protein N-acylethanolamine amidohydrolase, putative, expressed evidence_code:10F0H0E1IEG genomic_reference:SL2.40ch12 gene_region:54592268-54594586 tr…	N-acylethanolamine amidohydrolase Amidase signature enzyme
Misc	solyc10g078240.1	1.02	highly similar to ( 793) AT2G40890 | Symbols: CYP98A3 | CYP98A3 (cytochrome P450, family 98, subfamily A, polypeptide 3); monooxygenase/ p-coumarate 3-hydroxylase | chr2:17058291-17060532 REVERSEhighly similar to ( 796) C98A2_SOYBN Cytochrome P450 98A2 (EC 1.14.-.-) - Glycine max (Soybean)highly similar to ( 696) loc_os05g41440 12005.m27896 protein cytochrome P450 98A1, putative, expressed p450 C…	Cytochrome P450
Misc	solyc07g056160.2	-1.01	moderately similar to ( 414) AT3G50660 | Symbols: DWF4, CYP90B1, CLM, SNP2, SAV1 | DWF4 (DWARF 4); steroid 22-alpha hydroxylase | chr3:18814262-18817168 REVERSEhighly similar to ( 623) C724B_ORYSA Cytochrome P450 724B1 (EC 1.14.-.-) (OsDWARF11) (Dwarf protein 11) - Oryza sativa (Rice)highly similar to ( 623) loc_os04g39430 12004.m35156 protein cytochrome P450 724B1, putative, expressed p450 CypX …	Cytochrome P450
Misc	solyc04g081790.2	-1.08	moderately similar to ( 375) AT1G75880 | Symbols: | family II extracellular lipase 1 (EXL1) | chr1:28490564-28492298 FORWARDmoderately similar to ( 267) APG_BRANA Anter-specific proline-rich protein APG (Protein CEX) (Fragment) - Brassica napus (Rape)moderately similar to ( 336) loc_os10g30290 12010.m05891 protein anther-specific proline-rich protein APG precursor, putative, expressedSGNH_plant_l…	GDSL esterase/lipase At5g42170 ; Lipase, GDSL
Misc	solyc10g009580.2	-1.1	highly similar to ( 526) AT4G01070 | Symbols: GT72B1, UGT72B1 | GT72B1; UDP-glucosyltransferase/ UDP-glycosyltransferase/ transferase, transferring glycosyl groups | chr4:461858-463300 REVERSEweakly similar to ( 177) ZOX_PHAVU Zeatin O-xylosyltransferase (EC 2.4.2.40) (Zeatin O-beta-D-xylosyltransferase) - Phaseolus vulgaris (Kidney bean) (French bean)moderately similar to ( 379) loc_os11g38650 1…	UDP-glucosyltransferase
Misc	solyc04g080010.2	-1.12	moderately similar to ( 386) AT4G01070 | Symbols: GT72B1, UGT72B1 | GT72B1; UDP-glucosyltransferase/ UDP-glycosyltransferase/ transferase, transferring glycosyl groups | chr4:461858-463300 REVERSEweakly similar to ( 162) ZOX_PHAVU Zeatin O-xylosyltransferase (EC 2.4.2.40) (Zeatin O-beta-D-xylosyltransferase) - Phaseolus vulgaris (Kidney bean) (French bean)moderately similar to ( 329) loc_os01g432…	UDP-glucosyltransferase
Misc	solyc11g032050.1	-1.15	moderately similar to ( 455) AT1G71691 | Symbols: | GDSL-motif lipase/hydrolase family protein | chr1:26949395-26951173 REVERSEweakly similar to ( 124) APG_BRANA Anter-specific proline-rich protein APG (Protein CEX) (Fragment) - Brassica napus (Rape)moderately similar to ( 410) loc_os05g34700 12005.m27828 protein anther-specific proline-rich protein APG, putative, expressedSGNH_plant_lipase_like …	GDSL esterase/lipase At1g71691 ; Lipase, GDSL
Misc	solyc02g081770.1	-1.23	weakly similar to ( 165) AT3G26040 | Symbols: | transferase family protein | chr3:9519741-9521069 FORWARDTransferase evidence_code:10F0H1E1IEG genomic_reference:SL2.40ch02 gene_region:40169378-40170715 transcript_region:SL2.40ch02:40169378..40170715- go_terms:GO:0016740 functional_description:"Transferase family protein (AHRD V1 **-* D7LQY1_ARALY); contains Interpro domain(s) IPR003480 Transferas…	Transferase family protein
Misc	solyc04g050620.2	-1.26	moderately similar to ( 331) AT5G57260 | Symbols: CYP71B10 | CYP71B10; electron carrier/ heme binding / iron ion binding / monooxygenase/ oxygen binding | chr5:23198694-23200273 REVERSEmoderately similar to ( 325) C71A2_SOLME Cytochrome P450 71A2 (EC 1.14.-.-) (CYPLXXIA2) (P-450EG4) - Solanum melongena (Eggplant) (Aubergine)moderately similar to ( 351) loc_os09g26960 12009.m05848 protein flavonoi…	Cytochrome P450
Misc	solyc07g054900.2	-1.27	moderately similar to ( 211) AT2G23610 | Symbols: ATMES3, MES3 | MES3 (METHYL ESTERASE 3); hydrolase, acting on ester bonds / methyl indole-3-acetate esterase/ methyl jasmonate esterase | chr2:10044410-10046403 REVERSEweakly similar to ( 200) PIR7A_ORYSA Probable esterase PIR7A (EC 3.1.-.-) - Oryza sativa (Rice)moderately similar to ( 201) loc_os01g70860 12001.m13131 protein esterase PIR7A, putat…	Alpha-hydroxynitrile lyase; Alpha/beta hydrolase fold-1
Misc	solyc10g008710.2	-1.28	moderately similar to ( 342) AT1G28610 | Symbols: | GDSL-motif lipase, putative | chr1:10053877-10055665 REVERSEweakly similar to ( 171) EST_HEVBR Esterase precursor (EC 3.1.1.-) (Early nodule-specific protein homolog) (Latex allergen Hev b 13) - Hevea brasiliensis (Para rubber tree)moderately similar to ( 310) loc_os01g11710 12001.m07788 protein esterase precursor, putative, expressedSGNH_plant_…	GDSL esterase/lipase At1g28610; Lipase, GDSL
Misc	solyc01g056800.1	-1.47	weakly similar to ( 153) AT4G38040 | Symbols: | exostosin family protein | chr4:17867501-17869131 FORWARDweakly similar to ( 154) loc_os02g09430 12002.m06240 protein exostosin-like, putative, expressed Exostosin evidence_code:10F0H1E0IEG genomic_reference:SL2.40ch01 gene_region:49457466-49457957 transcript_region:SL2.40ch01:49457466..49457957+ go_terms:GO:0016020 functional_description:"Exostosin…	Exostosin-like
Misc	solyc03g031730.2	-1.48	highly similar to ( 590) AT4G21760 | Symbols: BGLU47 | BGLU47 (Beta-glucosidase 47); catalytic/ cation binding / hydrolase, hydrolyzing O-glycosyl compounds | chr4:11561229-11563871 FORWARDmoderately similar to ( 373) BGLC_MAIZE Beta-glucosidase, chloroplast precursor (EC 3.2.1.21) (Gentiobiase) (Cellobiase) (Beta-D-glucoside glucohydrolase) - Zea mays (Maize)highly similar to ( 564) loc_os04g433…	Beta-glucosidase 47
Misc	solyc06g074420.1	-1.54	highly similar to ( 584) AT2G27690 | Symbols: CYP94C1 | CYP94C1; fatty acid (omega-1)-hydroxylase/ oxygen binding | chr2:11809373-11810860 FORWARDvery weakly similar to (97.1) C97B2_SOYBN Cytochrome P450 97B2 (EC 1.14.-.-) - Glycine max (Soybean)highly similar to ( 582) loc_os01g63930 12001.m150779 protein cytochrome P450 94A2, putative, expressed p450 CypX evidence_code:10F0H1E1IEG genomic_refer…	Cytochrome P450
Misc	solyc05g010710.1	-1.55	moderately similar to ( 377) AT5G03490 | Symbols: | UDP-glucoronosyl/UDP-glucosyl transferase family protein | chr5:871550-872947 FORWARDweakly similar to ( 110) ZOX_PHAVU Zeatin O-xylosyltransferase (EC 2.4.2.40) (Zeatin O-beta-D-xylosyltransferase) - Phaseolus vulgaris (Kidney bean) (French bean)moderately similar to ( 249) loc_os08g38160 12008.m07801 protein cytokinin-O-glucosyltransferase 3, …	UDP-glucosyltransferase
Misc	solyc10g085880.1	-1.56	moderately similar to ( 377) AT2G36770 | Symbols: | UDP-glucoronosyl/UDP-glucosyl transferase family protein | chr2:15415227-15416717 REVERSEweakly similar to ( 174) ZOX_PHAVU Zeatin O-xylosyltransferase (EC 2.4.2.40) (Zeatin O-beta-D-xylosyltransferase) - Phaseolus vulgaris (Kidney bean) (French bean)moderately similar to ( 274) loc_os01g08090 12001.m07434 protein flavonol-3-O-glycoside-7-O-gluc…	UDP-glucosyltransferase family 1 protein
Misc	solyc01g090120.2	-1.65	weakly similar to ( 108) AT3G60280 | Symbols: UCC3 | UCC3 (UCLACYANIN 3); copper ion binding / electron carrier | chr3:22279867-22280633 REVERSEvery weakly similar to ( 100) BCP_PEA Blue copper protein precursor - Pisum sativum (Garden pea)very weakly similar to (95.5) loc_os01g57690 12001.m11918 protein early nodulin 20 precursor, putative, expressedCu_bind_like genomic_reference:SL2.40ch01 gene…	Blue copper protein
Misc	solyc02g094050.2	-1.66	weakly similar to ( 150) AT3G27200 | Symbols: | plastocyanin-like domain-containing protein | chr3:10043738-10044340 REVERSEvery weakly similar to (89.0) BCP_PEA Blue copper protein precursor - Pisum sativum (Garden pea)weakly similar to ( 101) loc_os03g57740 12003.m10686 protein blue copper protein precursor, putativeCu_bind_like genomic_reference:SL2.40ch02 gene_region:49268488-49269541 transcr…	Blue copper protein
Misc	solyc11g007500.1	-1.69	very weakly similar to (89.7) AT5G49690 | Symbols: | UDP-glucoronosyl/UDP-glucosyl transferase family protein | chr5:20189968-20191350 REVERSEweakly similar to ( 154) loc_os07g47550 12007.m08972 protein anthocyanidin 3-O-glucosyltransferase, putative, expressed evidence_code:10F0H1E1IEG genomic_reference:SL2.40ch11 gene_region:1763623-1765452 transcript_region:SL2.40ch11:1763623..1765452- go_term…	UDP-glucosyltransferase
Misc	solyc01g094140.2	-1.75	highly similar to ( 673) AT2G45510 | Symbols: CYP704A2 | CYP704A2; electron carrier/ heme binding / iron ion binding / monooxygenase/ oxygen binding | chr2:18753085-18754944 FORWARDweakly similar to ( 136) C97B2_SOYBN Cytochrome P450 97B2 (EC 1.14.-.-) - Glycine max (Soybean)highly similar to ( 555) loc_os06g03930 12006.m091585 protein cytochrome P450 86A1, putative, expressed p450 CypX genomic_r…	Cytochrome P450
Misc	solyc09g082220.1	-1.75	very weakly similar to ( 100) AT3G22560 | Symbols: | GCN5-related N-acetyltransferase (GNAT) family protein | chr3:7998915-7999442 REVERSE evidence_code:10F0H1E1IEG genomic_reference:SL2.40ch09 gene_region:63441959-63442276 transcript_region:SL2.40ch09:63441959..63442276- functional_description:"Acetyltransferase GNAT family protein expressed (AHRD V1 ***- Q75GC2_ORYSJ); contains Interpro domain(…	Acetyltransferase GNAT family protein expressed
Misc	solyc07g062510.2	-1.85	highly similar to ( 612) AT3G14690 | Symbols: CYP72A15 | CYP72A15; electron carrier/ heme binding / iron ion binding / monooxygenase/ oxygen binding | chr3:4937410-4939310 FORWARDhighly similar to ( 579) C72A1_CATRO Cytochrome P450 72A1 (EC 1.3.3.9) (CYPLXXII) (Secologanin synthase) (SLS) - Catharanthus roseus (Rosy periwinkle) (Madagascar periwinkle)highly similar to ( 559) loc_os01g43710 12001.…	Cytochrome P450
Misc	solyc01g066460.2	-2.25	moderately similar to ( 234) AT4G02340 | Symbols: | epoxide hydrolase, putative | chr4:1035722-1037403 FORWARDmoderately similar to ( 213) loc_os05g19150 12005.m06318 protein epoxide hydrolase 2, putative, expressed PRK03592 genomic_reference:SL2.40ch01 gene_region:66815377-66816300 transcript_region:SL2.40ch01:66815377..66816300+ go_terms:GO:0004301 functional_description:"Epoxide hydrolase (AHR…	Epoxide hydrolase
Misc	solyc02g091370.2	-2.26	moderately similar to ( 268) AT1G22400 | Symbols: UGT85A1, ATUGT85A1 | UGT85A1; UDP-glycosyltransferase/ cis-zeatin O-beta-D-glucosyltransferase/ glucuronosyltransferase/ trans-zeatin O-beta-D-glucosyltransferase/ transferase, transferring glycosyl groups / transferase, transferring hexosyl groups | chr1:7903851-7906607 REVERSEweakly similar to ( 144) IAAG_MAIZE Indole-3-acetate beta-glucosyltran…	Glucosyltransferase-2
Misc	solyc01g110000.2	-2.45	nearly identical (1146) AT4G36360 | Symbols: BGAL3 | BGAL3 (beta-galactosidase 3); beta-galactosidase/ catalytic/ cation binding / sugar binding | chr4:17176840-17181143 REVERSEhighly similar to ( 983) BGAL_ASPOF Beta-galactosidase precursor (EC 3.2.1.23) (Lactase) - Asparagus officinalis (Garden asparagus)nearly identical (1107) loc_os03g06940 12003.m35030 protein beta-galactosidase precursor, p…	Beta-galactosidase
Misc	solyc01g104400.2	-2.72	weakly similar to ( 144) AT2G02850 | Symbols: ARPN | ARPN (PLANTACYANIN); copper ion binding / electron carrier | chr2:826630-827720 REVERSEweakly similar to ( 144) BABL_CUCSA Basic blue protein (Cusacyanin) (Plantacyanin) (CBP) - Cucumis sativus (Cucumber)weakly similar to ( 145) loc_os03g50160 12003.m10011 protein chemocyanin precursor, putative, expressedCu_bind_like genomic_reference:SL2.40ch…	Blue copper protein

## Sheet: Mitochondria
Classification	ID	Log(FC)	ITAG	Description
Mitochondria	solyc02g091130.2	3.5	highly similar to ( 831) AT5G08690 | Symbols: | ATP synthase beta chain 2, mitochondrial | chr5:2825739-2828352 FORWARDhighly similar to ( 875) ATPBM_ORYSA ATP synthase subunit beta, mitochondrial precursor (EC 3.6.3.14) - Oryza sativa (Rice)highly similar to ( 879) loc_os01g49190 12001.m11106 protein ATP synthase beta chain, mitochondrial precursor, putative, expressed PRK09280 AtpD atpB PRK1259…	ATP synthase subunit beta
Mitochondria	solyc09g050020.1	2.17	highly similar to ( 560) ATMG00220 | Symbols: COB | Mitochondrial apocytochrome b (cob) gene encodes a subunit of the ubiquinol-cytochrome c oxidoreductase and is part of a 5 kb transcript. The transcript also contains a pseudogene for ribosomal protein S14 called RPS15 and a tRNA(Ser) gene. Both the Cob and RPS15 genes are edited in the transcript. | chrM:60235-61416 FORWARDhighly similar to ( 5…	Cytochrome b
Mitochondria	solyc07g019510.2	1.87	highly similar to ( 765) ATMG01360 | Symbols: COX1 | cytochrome c oxidase subunit 1 | chrM:349830-351413 REVERSEhighly similar to ( 772) COX1_SOYBN Cytochrome c oxidase subunit 1 (EC 1.9.3.1) (Cytochrome c oxidase polypeptide I) - Glycine max (Soybean)highly similar to ( 541) loc_osm1g00550 11706.m00048 protein Cytochrome c oxidase subunit1 Cyt_c_Oxidase_I COX1 CyoB Heme_Cu_Oxidase_I Ubiquinol_Ox…	Cytochrome c oxidase subunit 1

## Sheet: Metal handling
Classification	ID	Log(FC)	ITAG	Description
Metal handling	solyc07g056210.2	2.112	genomic_reference:SL2.40ch07 gene_region:61378852-61379980 transcript_region:SL2.40ch07:61378852..61379980- functional_description:"Unknown Protein (AHRD V1)"	Unknown Protein
Metal handling	solyc09g092430.2	-1.39	highly similar to ( 794) AT4G14040 | Symbols: EDA38, SBP2 | SBP2 (SELENIUM-BINDING PROTEIN 2); selenium binding | chr4:8100691-8102828 REVERSEhighly similar to ( 773) loc_os01g68770 12001.m12979 protein selenium-binding protein, putative, expressed SBP56 genomic_reference:SL2.40ch09 gene_region:66876196-66880227 transcript_region:SL2.40ch09:66876196..66880227+ go_terms:GO:0008430 functional_descr…	Selenium binding protein
Metal handling	solyc04g058100.2	-1.62	genomic_reference:SL2.40ch04 gene_region:54362100-54362884 transcript_region:SL2.40ch04:54362100..54362884+ go_terms:GO:0005507 functional_description:"Type 2 metallothionein (AHRD V1 ***- B3VKV5_SOLNI); contains Interpro domain(s) IPR000347 Plant metallothionein, family 15 "	Type 2 metallothionein
Metal handling	solyc08g075880.2	-1.78	moderately similar to ( 242) AT2G18196 | Symbols: | metal ion binding | chr2:7920793-7922268 REVERSEmoderately similar to ( 208) loc_os03g02860 12003.m05825 protein metal ion binding protein, putative, expressed genomic_reference:SL2.40ch08 gene_region:57133149-57134844 transcript_region:SL2.40ch08:57133149..57134844- go_terms:GO:0030001 functional_description:"Metal ion binding protein (AHRD V1 …	Metal ion binding protein

## Sheet: CHO
Classification	ID	Log(FC)	ITAG	Description
Major CHO metabolism	solyc01g109790.2	1.9	highly similar to ( 780) AT4G39210 | Symbols: APL3 | APL3; glucose-1-phosphate adenylyltransferase | chr4:18260332-18263181 FORWARDhighly similar to ( 958) GLGL1_SOLTU Glucose-1-phosphate adenylyltransferase large subunit 1 (EC 2.7.7.27) (ADP-glucose synthase) (ADP-glucose pyrophosphorylase) (AGPase S) (Alpha-D-glucose-1-phosphate adenyl transferase) (Fragment) - Solanum tuberosum (Potato)highly …	Glucose-1-phosphate adenylyltransferase
Major CHO metabolism	solyc09g091030.2	1.43	highly similar to ( 845) AT3G23920 | Symbols: BAM1, BMY7, TR-BAMY | BAM1 (BETA-AMYLASE 1); beta-amylase | chr3:8641722-8644199 FORWARDmoderately similar to ( 452) AMYB_MEDSA Beta-amylase (EC 3.2.1.2) (1,4-alpha-D-glucan maltohydrolase) - Medicago sativa (Alfalfa)highly similar to ( 707) loc_os03g04770 12003.m06004 protein beta-amylase, putative, expressedGlyco_hydro_14 genomic_reference:SL2.40ch0…	Beta-amylase
Major CHO metabolism	solyc03g006860.2	1.31	moderately similar to ( 493) AT5G51830 | Symbols: | pfkB-type carbohydrate kinase family protein | chr5:21069709-21071450 FORWARDmoderately similar to ( 390) SCRK1_ORYSA Fructokinase-1 (EC 2.7.1.4) (Fructokinase I) (OsFKI) - Oryza sativa (Rice)moderately similar to ( 414) loc_os06g12600 12006.m05976 protein fructokinase-2, putative, expressed bac_FRK PRK09434 PfkB KdgK RbsK ribokinase ribokinase_…	Fructokinase
Major CHO metabolism	solyc09g092130.2	1.26	nearly identical (1571) AT1G04920 | Symbols: ATSPS3F | ATSPS3F (sucrose phosphate synthase 3F); sucrose-phosphate synthase/ transferase, transferring glycosyl groups | chr1:1391674-1395756 REVERSEnearly identical (1457) SPS_MAIZE Sucrose-phosphate synthase (EC 2.4.1.14) (UDP-glucose-fructose-phosphate glucosyltransferase) - Zea mays (Maize)nearly identical (1414) loc_os01g69030 12001.m150823 prot…	Sucrose phosphate synthase
Major CHO metabolism	solyc10g083290.1	1.04	highly similar to ( 719) AT3G52600 | Symbols: AtcwINV2 | AtcwINV2 (Arabidopsis thaliana cell wall invertase 2); hydrolase, hydrolyzing O-glycosyl compounds | chr3:19507080-19508833 REVERSEhighly similar to ( 806) INV1_DAUCA Beta-fructofuranosidase, insoluble isoenzyme 1 precursor (EC 3.2.1.26) (Sucrose hydrolase 1) (Invertase 1) (Cell wall beta-fructosidase 1) - Daucus carota (Carrot)highly simil…	Beta-fructofuranosidase insoluble isoenzyme 2
Classification	ID	Log(FC)	ITAG	Description
Minor CHO metabolism	solyc05g051850.2	1.03	highly similar to ( 943) AT5G10170 | Symbols: ATMIPS3, MIPS3 | MIPS3 (MYO-INOSITOL-1-PHOSTPATE SYNTHASE 3); binding / catalytic/ inositol-3-phosphate synthase | chr5:3187538-3190161 REVERSEhighly similar to ( 986) INO1_TOBAC Inositol-3-phosphate synthase (EC 5.5.1.4) (Myo-inositol-1-phosphate synthase) (MI-1-P synthase) (IPS) - Nicotiana tabacum (Common tobacco)highly similar to ( 937) loc_os03g0…	Inositol-3-phosphate synthase
Minor CHO metabolism	solyc02g072150.2	-1.06	nearly identical (1366) AT1G06410 | Symbols: ATTPS7, TPS7, ATTPSA | ATTPS7; alpha,alpha-trehalose-phosphate synthase (UDP-forming)/ transferase, transferring glycosyl groups / trehalose-phosphatase | chr1:1955413-1958153 FORWARDnearly identical (1291) loc_os01g54560 12001.m150713 protein trehalose synthase, putative, expressed Glyco_transf_20 OtsA Trehalose_PPase PRK10117 OtsB genomic_reference:S…	Alpha alpha-trehalose-phosphate synthase
Minor CHO metabolism	solyc07g006500.2	-1.11	nearly identical (1147) AT2G18700 | Symbols: ATTPS11, TPS11, ATTPSB | ATTPS11; transferase, transferring glycosyl groups | chr2:8109043-8111799 FORWARDnearly identical (1040) loc_os02g54820 12002.m33906 protein trehalose-6-phosphate synthase, putative, expressed Glyco_transf_20 OtsA Trehalose_PPase PRK10117 OtsB genomic_reference:SL2.40ch07 gene_region:1301353-1304574 transcript_region:SL2.40ch07…	Alpha alpha-trehalose-phosphate synthase

## Sheet: RLKs
Type	ID	Log(FC)	ITAG	Description
S-locus	solyc07g005110.2	2.2	moderately similar to ( 323) AT3G16030 | Symbols: CES101 | CES101 (CALLUS EXPRESSION OF RBCS 101); ATP binding / carbohydrate binding / kinase/ protein kinase/ protein serine/threonine kinase/ protein tyrosine kinase/ sugar binding | chr3:5439609-5442802 FORWARDweakly similar to ( 182) PSKR_DAUCA Phytosulfokine receptor precursor (EC 2.7.11.1) (Phytosulfokine LRR receptor kinase) - Daucus carota …	S-receptor kinase-like protein 1
LRR	solyc04g012100.1	2.01	highly similar to ( 545) AT3G47570 | Symbols: | leucine-rich repeat transmembrane protein kinase, putative | chr3:17527611-17530748 FORWARDmoderately similar to ( 413) RPK1_IPONI Receptor-like protein kinase precursor (EC 2.7.11.1) - Ipomoea nil (Japanese morning glory) (Pharbitis nil)highly similar to ( 692) loc_os11g46980 12011.m08478 protein receptor-like protein kinase precursor, putative S_T…	LRR receptor-like serine/threonine-protein kinase
WAK	solyc02g079600.2	1.69	genomic_reference:SL2.40ch02 gene_region:38701362-38704468 transcript_region:SL2.40ch02:38701362..38704468+ functional_description:"Receptor-like protein kinase (AHRD V1 *-*- Q9M575_ORYSA)"	Receptor-like protein kinase
S-locus	solyc03g007790.2	1.64	highly similar to ( 689) AT5G24080 | Symbols: | protein kinase family protein | chr5:8139334-8141014 REVERSEmoderately similar to ( 223) KPRO_MAIZE Putative receptor protein kinase ZmPK1 precursor (EC 2.7.11.1) - Zea mays (Maize)moderately similar to ( 448) loc_os07g36780 12007.m07928 protein serine/threonine-protein kinase receptor precursor, putative, expressed S_TKc Pkinase S_TKc TyrKc Pkinase…	Receptor-like protein kinase
CRK	solyc12g005720.1	1.62	moderately similar to ( 238) AT3G22060 | Symbols: | receptor protein kinase-related | chr3:7771065-7772137 FORWARDweakly similar to ( 150) loc_os07g35260 12007.m079704 protein serine/threonine kinase-like protein, putative, expressed evidence_code:10F0H1E0IEG genomic_reference:SL2.40ch12 gene_region:382632-383354 transcript_region:SL2.40ch12:382632..383354- functional_description:"Cysteine-rich r…	Cysteine-rich receptor-like protein kinase
LRR	solyc04g012190.1	1.57	moderately similar to ( 233) AT3G47570 | Symbols: | leucine-rich repeat transmembrane protein kinase, putative | chr3:17527611-17530748 FORWARDmoderately similar to ( 203) PSKR_DAUCA Phytosulfokine receptor precursor (EC 2.7.11.1) (Phytosulfokine LRR receptor kinase) - Daucus carota (Carrot)moderately similar to ( 319) loc_os10g13970 12010.m04648 protein leucine-rich repeat receptor protein kinas…	LRR Receptor like kinase
LRR	solyc07g008600.1	1.49	moderately similar to ( 355) AT2G34930 | Symbols: | disease resistance family protein | chr2:14737169-14739886 REVERSEweakly similar to ( 150) RPK1_IPONI Receptor-like protein kinase precursor (EC 2.7.11.1) - Ipomoea nil (Japanese morning glory) (Pharbitis nil)moderately similar to ( 409) loc_os01g41770 12001.m10445 protein expressed protein evidence_code:10F0H1E1IEG genomic_reference:SL2.40ch07 …	LRR receptor-like serine/threonine-protein kinase
S-locus	solyc07g055560.2	1.47	highly similar to ( 631) AT3G14690 | Symbols: CYP72A15 | CYP72A15; electron carrier/ heme binding / iron ion binding / monooxygenase/ oxygen binding | chr3:4937410-4939310 FORWARDhighly similar to ( 550) C72A1_CATRO Cytochrome P450 72A1 (EC 1.3.3.9) (CYPLXXII) (Secologanin synthase) (SLS) - Catharanthus roseus (Rosy periwinkle) (Madagascar periwinkle)highly similar to ( 596) loc_os01g43710 12001.…	G-type lectin S-receptor-like serine/threonine-protein kinase At2g19130
LRR	solyc02g031790.1	1.34	highly similar to ( 548) AT3G47570 | Symbols: | leucine-rich repeat transmembrane protein kinase, putative | chr3:17527611-17530748 FORWARDmoderately similar to ( 428) RPK1_IPONI Receptor-like protein kinase precursor (EC 2.7.11.1) - Ipomoea nil (Japanese morning glory) (Pharbitis nil)highly similar to ( 690) loc_os11g46980 12011.m08478 protein receptor-like protein kinase precursor, putative S_T…	Receptor like kinase
LRR	solyc11g011180.1	1.31	moderately similar to ( 437) AT1G74180 | Symbols: AtRLP14 | AtRLP14 (Receptor Like Protein 14); protein binding | chr1:27897197-27900908 REVERSEweakly similar to ( 186) RPK1_IPONI Receptor-like protein kinase precursor (EC 2.7.11.1) - Ipomoea nil (Japanese morning glory) (Pharbitis nil)moderately similar to ( 335) loc_os04g55440 12004.m10436 protein hcr9-4E, putative, expressed evidence_code:10F0…	LRR receptor-like serine/threonine-protein kinase
S-locus	solyc03g078360.1	1.18	moderately similar to ( 314) AT1G34300 | Symbols: | lectin protein kinase family protein | chr1:12503450-12505939 FORWARDmoderately similar to ( 284) KPRO_MAIZE Putative receptor protein kinase ZmPK1 precursor (EC 2.7.11.1) - Zea mays (Maize)moderately similar to ( 479) loc_os03g61310 12003.m11014 protein receptor-like protein kinase, putative, expressed TyrKc S_TKc Pkinase_Tyr Pkinase S_TKc PTKc…	Receptor-like protein kinase
DUF26	solyc04g007380.1	1.18	moderately similar to ( 395) AT1G70250 | Symbols: | receptor serine/threonine kinase, putative | chr1:26452975-26456088 FORWARDmoderately similar to ( 208) KPRO_MAIZE Putative receptor protein kinase ZmPK1 precursor (EC 2.7.11.1) - Zea mays (Maize)moderately similar to ( 402) loc_os01g49580 12001.m11145 protein protein kinase domain containing protein, expressed Pkinase_Tyr Pkinase S_TKc TyrKc PT…	Receptor serine/threonine kinase-like protein
CRK	solyc09g057960.1	1.18	moderately similar to ( 222) AT5G48540 | Symbols: | 33 kDa secretory protein-related | chr5:19669096-19669887 REVERSEweakly similar to ( 197) loc_os03g16960 12003.m07128 protein CRK6, putative, expressed evidence_code:10F0H1E1IEG genomic_reference:SL2.40ch09 gene_region:48154504-48155289 transcript_region:SL2.40ch09:48154504..48155289- functional_description:"Cysteine-rich receptor-like protein k…	Cysteine-rich receptor-like protein kinase
Misc RLK	solyc01g098420.1	1.16	very weakly similar to (85.1) loc_os08g42580 12008.m62032 protein lysM receptor-like kinase, putative, expressed evidence_code:10F0H1E0IEG genomic_reference:SL2.40ch01 gene_region:80699169-80700899 transcript_region:SL2.40ch01:80699169..80700899+ go_terms:GO:0006468,GO:0046677 functional_description:"Receptor-like protein kinase At5g59670 (AHRD V1 *-*- RLK7_ARATH); contains Interpro domain(s) IPR…	Receptor-like protein kinase At5g59670
LRR	solyc11g017280.1	1.15	highly similar to ( 546) AT1G34420 | Symbols: | leucine-rich repeat family protein / protein kinase family protein | chr1:12584587-12587570 FORWARDweakly similar to ( 161) RPK1_IPONI Receptor-like protein kinase precursor (EC 2.7.11.1) - Ipomoea nil (Japanese morning glory) (Pharbitis nil)highly similar to ( 503) loc_os12g08180 12012.m04805 protein receptor-like protein kinase precursor, putative…	Receptor like kinase
LRR	solyc08g077740.1	1.1	moderately similar to ( 388) AT1G47890 | Symbols: AtRLP7 | AtRLP7 (Receptor Like Protein 7); kinase/ protein binding | chr1:17643976-17647035 FORWARDmoderately similar to ( 211) RPK1_IPONI Receptor-like protein kinase precursor (EC 2.7.11.1) - Ipomoea nil (Japanese morning glory) (Pharbitis nil)moderately similar to ( 347) loc_os01g06920 12001.m07320 protein resistance protein SlVe1 precursor, pu…	LRR receptor-like serine/threonine-protein kinase
CRK	solyc03g111530.2	1.1	weakly similar to ( 105) AT4G05200 | Symbols: | protein kinase family protein | chr4:2679793-2682309 REVERSEvery weakly similar to (92.4) loc_os03g36650 12003.m08785 protein serine/threonine kinase-like protein, putative, expressed genomic_reference:SL2.40ch03 gene_region:56188331-56191018 transcript_region:SL2.40ch03:56188331..56191018- functional_description:"Cysteine-rich receptor-like protein…	Cysteine-rich receptor-like protein kinase
S-locus	solyc03g111540.1	1.08	moderately similar to ( 496) AT4G05200 | Symbols: | protein kinase family protein | chr4:2679793-2682309 REVERSEmoderately similar to ( 206) PSKR_DAUCA Phytosulfokine receptor precursor (EC 2.7.11.1) (Phytosulfokine LRR receptor kinase) - Daucus carota (Carrot)moderately similar to ( 469) loc_os07g35140 12007.m07770 protein receptor-like serine-threonine protein kinase, putative, expressed Pkinas…	RLK, Receptor like protein, S locus glycoprotein
DUF26	solyc02g080010.2	1.03	moderately similar to ( 475) AT4G05200 | Symbols: | protein kinase family protein | chr4:2679793-2682309 REVERSEweakly similar to ( 198) NORK_PEA Nodulation receptor kinase precursor (EC 2.7.11.1) - Pisum sativum (Garden pea)moderately similar to ( 369) loc_os11g45540 12011.m08386 protein protein kinase domain containing protein, expressed Pkinase_Tyr TyrKc Pkinase S_TKc PTKc S_TKc PTKc_Srm_Brk P…	RLK
LRR	solyc06g084420.1	-1.01	highly similar to ( 549) AT1G03440 | Symbols: | leucine-rich repeat family protein | chr1:852681-853874 FORWARDweakly similar to ( 113) RPK1_IPONI Receptor-like protein kinase precursor (EC 2.7.11.1) - Ipomoea nil (Japanese morning glory) (Pharbitis nil)moderately similar to ( 457) loc_os05g33690 12005.m27820 protein receptor-like protein kinase precursor, putative, expressed evidence_code:10F0H1…	LRR receptor-like serine/threonine-protein kinase
LRR	solyc06g006010.1	-1.4	moderately similar to ( 471) AT3G47570 | Symbols: | leucine-rich repeat transmembrane protein kinase, putative | chr3:17527611-17530748 FORWARDmoderately similar to ( 360) RPK1_IPONI Receptor-like protein kinase precursor (EC 2.7.11.1) - Ipomoea nil (Japanese morning glory) (Pharbitis nil)highly similar to ( 533) loc_os11g47180 12011.m08498 protein receptor-like protein kinase precursor, putative…	Receptor like kinase
LRR	solyc02g071790.1	-1.89	evidence_code:10F0H0E0IEG genomic_reference:SL2.40ch02 gene_region:35721594-35723176 transcript_region:SL2.40ch02:35721594..35723176+ go_terms:GO:0005515 functional_description:"Receptor-like serine/threonine kinase (AHRD V1 --*- C6FF81_SOYBN); contains Interpro domain(s) IPR001611 Leucine-rich repeat "	Receptor-like serine/threonine kinase
LRR	solyc12g100030.1	-1.96	moderately similar to ( 415) AT1G45616 | Symbols: AtRLP6 | AtRLP6 (Receptor Like Protein 6); protein binding | chr1:17183550-17186534 REVERSEweakly similar to ( 180) RPK1_IPONI Receptor-like protein kinase precursor (EC 2.7.11.1) - Ipomoea nil (Japanese morning glory) (Pharbitis nil)moderately similar to ( 377) loc_os01g04070 12001.m07042 protein verticillium wilt disease resistance protein, puta…	LRR receptor-like serine/threonine-protein kinase
LRR	solyc10g007830.1	-2	moderately similar to ( 394) AT2G42800 | Symbols: AtRLP29 | AtRLP29 (Receptor Like Protein 29); protein binding | chr2:17808157-17809545 REVERSEweakly similar to ( 103) RPK1_IPONI Receptor-like protein kinase precursor (EC 2.7.11.1) - Ipomoea nil (Japanese morning glory) (Pharbitis nil)moderately similar to ( 345) loc_os05g45430 12005.m08668 protein too many mouths protein precursor, putative, ex…	LRR receptor-like serine/threonine-protein kinase

## Sheet: Signaling
Classification	ID	Log(FC)	ITAG	Description
CDPK	solyc12g099790.1	3.76	highly similar to ( 875) AT5G12180 | Symbols: CPK17 | CPK17; ATP binding / calcium ion binding / calmodulin-dependent protein kinase/ kinase/ protein kinase/ protein serine/threonine kinase | chr5:3937136-3939323 FORWARDhighly similar to ( 675) CDPK2_ORYSA Calcium-dependent protein kinase, isoform 2 (EC 2.7.11.1) (CDPK 2) - Oryza sativa (Rice)highly similar to ( 828) loc_os01g59360 12001.m12073 p…	Calcium-dependent protein kinase 17
CDPK	solyc09g018280.1	1	moderately similar to ( 480) AT5G01820 | Symbols: ATSR1, SnRK3.15, CIPK14, ATCIPK14 | ATSR1 (ARABIDOPSIS THALIANA SERINE/THREONINE PROTEIN KINASE 1); ATP binding / kinase/ protein kinase/ protein serine/threonine kinase | chr5:313423-314751 REVERSEmoderately similar to ( 343) CIPK1_ORYSA CIPK-like protein 1 (EC 2.7.11.1) (OsCK1) - Oryza sativa (Rice)moderately similar to ( 417) loc_os07g48100 120…	Calcium/calmodulin-dependent protein kinase type 1
Classification	ID	Log(FC)	ITAG	Description
MAPK	solyc02g090990.1	2.46	moderately similar to ( 304) AT4G36950 | Symbols: MAPKKK21 | MAPKKK21; ATP binding / protein kinase/ protein serine/threonine kinase | chr4:17422834-17423844 REVERSEweakly similar to ( 104) M2K1_ORYSA Mitogen-activated protein kinase kinase 1 (EC 2.7.12.2) (MAP kinase kinase 1) (MAPKK1) (OsMEK1) - Oryza sativa (Rice)weakly similar to ( 191) loc_os02g21700 12002.m07409 protein mitogen-activated pr…	Serine/threonine-protein kinase 36
Classification	ID	Log(FC)	ITAG	Description
Calcium signaling	solyc06g069740.1	1.76	very weakly similar to (82.0) AT3G29000 | Symbols: | calcium-binding EF hand family protein | chr3:11005791-11006375 FORWARD evidence_code:10F0H0E0IEG genomic_reference:SL2.40ch06 gene_region:39824282-39824839 transcript_region:SL2.40ch06:39824282..39824839- go_terms:GO:0005515,GO:0005509 functional_description:"Calmodulin-like protein (AHRD V1 *-*- B6TXW9_MAIZE); contains Interpro domain(s) IPR0…	Calmodulin-like protein
Calcium signaling	solyc05g053210.2	1.56	highly similar to ( 587) AT3G17510 | Symbols: CIPK1, SnRK3.16 | CIPK1 (CBL-INTERACTING PROTEIN KINASE 1); kinase/ protein binding | chr3:5989309-5992627 REVERSEmoderately similar to ( 447) CIPK1_ORYSA CIPK-like protein 1 (EC 2.7.11.1) (OsCK1) - Oryza sativa (Rice)highly similar to ( 592) loc_os01g18800 12001.m150556 protein CBL-interacting serine/threonine-protein kinase 1, putative, expressed S_…	CBL-interacting protein kinase 1
Calcium signaling	solyc03g115930.1	1.46	very weakly similar to (89.7) AT5G39670 | Symbols: | calcium-binding EF hand family protein | chr5:15883270-15883884 FORWARD evidence_code:10F1H0E1IEG genomic_reference:SL2.40ch03 gene_region:59555528-59556136 transcript_region:SL2.40ch03:59555528..59556136- go_terms:GO:0005509 functional_description:"Calmodulin-like protein (AHRD V1 *-*- B6TXW9_MAIZE); contains Interpro domain(s) IPR011992 EF-Ha…	Calmodulin-like protein
Calcium signaling	solyc12g009700.1	1.38	moderately similar to ( 321) AT1G05500 | Symbols: SYTE, ATSYTE, NTMC2TYPE2.1, NTMC2T2.1 | NTMC2T2.1 | chr1:1625098-1628940 FORWARDmoderately similar to ( 297) loc_os04g55220 12004.m10414 protein lipid binding protein, putative, expressed evidence_code:10F0H1E0IEG genomic_reference:SL2.40ch12 gene_region:2943402-2948669 transcript_region:SL2.40ch12:2943402..2948669+ functional_description:"Plant s…	Plant synaptotagmin
Calcium signaling	solyc03g113970.2	1.35	weakly similar to ( 159) AT4G25800 | Symbols: | calmodulin-binding protein | chr4:13125224-13127765 FORWARDweakly similar to ( 159) loc_os02g08120 12002.m33346 protein calmodulin binding protein, putative, expressedCalmodulin_bind genomic_reference:SL2.40ch03 gene_region:58080123-58085965 transcript_region:SL2.40ch03:58080123..58085965+ go_terms:GO:0005516 functional_description:"Calmodulin bindi…	Calmodulin binding protein
Calcium signaling	solyc08g083240.2	-1.09	moderately similar to ( 248) AT1G01110 | Symbols: IQD18 | IQD18 (IQ-domain 18) | chr1:52239-54494 FORWARDmoderately similar to ( 219) loc_os08g02250 12008.m04369 protein calmodulin binding protein, putative, expressed genomic_reference:SL2.40ch08 gene_region:62923263-62925544 transcript_region:SL2.40ch08:62923263..62925544- go_terms:GO:0005516 functional_description:"Calmodulin-binding protein fa…	Calmodulin-binding protein family-like
Calcium signaling	solyc07g063690.1	-1.11	weakly similar to ( 115) AT5G54490 | Symbols: PBP1 | PBP1 (PINOID-BINDING PROTEIN 1); calcium ion binding / protein binding | chr5:22121458-22121841 FORWARDweakly similar to ( 115) loc_os06g46950 12006.m09221 protein EF-hand Ca2+-binding protein CCD1, putative, expressed evidence_code:10F1H0E1IEG genomic_reference:SL2.40ch07 gene_region:63311902-63312243 transcript_region:SL2.40ch07:63311902..633…	Calcium-binding EF hand family protein
Calcium signaling	solyc04g079080.2	-1.046	genomic_reference:SL2.40ch04 gene_region:61264421-61267652 transcript_region:SL2.40ch04:61264421..61267652+ go_terms:GO:0008290,GO:0005509 functional_description:"Calmodulin (AHRD V1 *-*- Q178H5_AEDAE); contains Interpro domain(s) IPR011992 EF-Hand type "	Calmodulin
Calcium signaling	solyc02g079520.1	-2	weakly similar to ( 112) AT4G27280 | Symbols: | calcium-binding EF hand family protein | chr4:13663770-13664162 REVERSEweakly similar to ( 114) loc_os06g46950 12006.m09221 protein EF-hand Ca2+-binding protein CCD1, putative, expressed evidence_code:10F1H1E1IEG genomic_reference:SL2.40ch02 gene_region:38633386-38633733 transcript_region:SL2.40ch02:38633386..38633733- go_terms:GO:0031683 functional…	Calcium-binding EF hand family protein
Calcium signaling	solyc11g006230.1	-2.4	weakly similar to ( 117) AT5G28640 | Symbols: AN3, GIF, GIF1 | AN3 (ANGUSTIFOLIA 3); protein binding / transcription coactivator | chr5:10647831-10649620 REVERSEvery weakly similar to (88.6) loc_os03g52320 12003.m10209 protein GIF2, putative, expressed evidence_code:10F0H0E1IEG genomic_reference:SL2.40ch11 gene_region:981174-984561 transcript_region:SL2.40ch11:981174..984561- functional_descripti…	Calcium-responsive transactivator
Classification	ID	Log(FC)	ITAG	Description
Signaling	solyc04g074430.1	1.21	weakly similar to ( 140) AT4G08950 | Symbols: EXO | EXO (EXORDIUM) | chr4:5740378-5741322 FORWARDweakly similar to ( 117) loc_os02g52040 12002.m10235 protein phi-1-like phosphate-induced protein, putative, expressedPhi_1 evidence_code:10F1H1E1IEG genomic_reference:SL2.40ch04 gene_region:58025424-58025822 transcript_region:SL2.40ch04:58025424..58025822- functional_description:"Phi-1 protein (Fragm…	Phi-1 protein
Signaling	solyc04g079820.2	1.32	moderately similar to ( 394) AT1G47510 | Symbols: AT5PTASE11, 5PTASE11 | 5PTASE11 (INOSITOL POLYPHOSPHATE 5-PHOSPHATASE 11); hydrolase/ phosphatidylinositol-3,4,5-trisphosphate 5-phosphatase/ phosphatidylinositol-3,5-bisphosphate 5-phosphatase/ phosphatidylinositol-4,5-bisphosphate 5-phosphatase | chr1:17435991-17438296 REVERSEmoderately similar to ( 416) loc_os03g42810 12003.m09332 protein type …	Inositol 5-phosphatase 4
Signaling	solyc08g080770.2	1.2	weakly similar to ( 162) AT3G14260 | Symbols: | unknown protein | chr3:4747986-4748779 REVERSEweakly similar to ( 133) loc_os01g70600 12001.m13106 protein GTP binding protein, putative, expressedDUF567 genomic_reference:SL2.40ch08 gene_region:61143809-61144913 transcript_region:SL2.40ch08:61143809..61144913+ functional_description:"GTP binding protein (AHRD V1 **-- B6TE93_MAIZE); contains Interpr…	GTP binding protein
Signaling	solyc04g082050.2	-1.03	moderately similar to ( 264) AT4G35750 | Symbols: | Rho-GTPase-activating protein-related | chr4:16940865-16941674 REVERSEweakly similar to ( 187) loc_os04g47330 12004.m09679 protein cellular retinaldehyde-binding/triple function, C-terminal, putative, expressed genomic_reference:SL2.40ch04 gene_region:63447153-63449044 transcript_region:SL2.40ch04:63447153..63449044+ functional_description:"Cell…	Cellular retinaldehyde-binding/triple function C-terminal
Signaling	solyc09g065480.1	-1.06	highly similar to ( 711) AT3G63240 | Symbols: | endonuclease/exonuclease/phosphatase family protein | chr3:23364411-23366876 REVERSEhighly similar to ( 698) loc_os07g07950 12007.m29082 protein type I inositol-1,4,5-trisphosphate 5-phosphatase CVP2, putative, expressed IPPc COG5411 Exo_endo_phos evidence_code:10F0H1E0IEG genomic_reference:SL2.40ch09 gene_region:59188535-59191538 transcript_region:…	Inositol-1 4 5-trisphosphate 5-Phosphatase-like protein
Signaling	solyc10g005100.2	-1.106	weakly similar to ( 116) AT4G20260 | Symbols: ATPCAP1, PCAP1 | DREPP plasma membrane polypeptide family protein | chr4:10941593-10943227 FORWARDvery weakly similar to (97.1) loc_os02g18410 12002.m07084 protein DREPP2 protein, putative, expressedDREPP genomic_reference:SL2.40ch10 gene_region:92148-94188 transcript_region:SL2.40ch10:92148..94188+ functional_description:"Salt stress root protein RS1…	Salt stress root protein RS1
Signaling	solyc05g051580.2	-1.11	highly similar to ( 589) AT5G10250 | Symbols: DOT3 | DOT3 (DEFECTIVELY ORGANIZED TRIBUTARIES 3); protein binding / signal transducer | chr5:3217028-3219368 REVERSEmoderately similar to ( 462) NPH3_ORYSA Coleoptile phototropism protein 1 (Non-phototropic hypocotyl 3-like protein) (NPH3-like protein) - Oryza sativa (Rice)moderately similar to ( 462) loc_os02g35970 12002.m08685 protein transposon pr…	Phototropic-responsive NPH3 family protein
Signaling	solyc12g099970.1	-1.23	moderately similar to ( 274) AT5G21170 | Symbols: | 5-AMP-activated protein kinase beta-2 subunit, putative | chr5:7205718-7208239 FORWARDmoderately similar to ( 249) loc_os05g41220 12005.m64249 protein SNF1-related protein kinase regulatory subunit beta-1, putative, expressed AMPKBI AMPKbeta_GBD_like evidence_code:10F0H1E1IEG genomic_reference:SL2.40ch12 gene_region:65242252-65245386 transcript_…	5-amp-activated protein kinase beta subunit
Signaling	solyc03g117250.2	-1.317	highly similar to ( 531) AT5G25250 | Symbols: | FUNCTIONS IN: molecular_function unknown; INVOLVED IN: biological_process unknown; LOCATED IN: plasma membrane, vacuole; EXPRESSED IN: cultured cell; CONTAINS InterPro DOMAIN/s: Band 7 protein (InterPro:IPR001107); BEST Arabidopsis thaliana protein match is: unknown protein (TAIR:AT5G25260.1); Has 4072 Blast hits to 3210 proteins in 656 species: Arc…	Flotillin 1
Signaling	solyc02g077400.2	-1.47	moderately similar to ( 342) AT5G45970 | Symbols: ARAC2, ROP7, ATRAC2, ATROP7 | ARAC2 (ARABIDOPSIS RAC-LIKE 2); GTP binding | chr5:18643761-18645758 FORWARDmoderately similar to ( 343) RAC7_ORYSA Rac-like GTP-binding protein 7 (OsRac7) (GTPase protein ROP5) - Oryza sativa (Rice)moderately similar to ( 343) loc_os02g20850 12002.m07327 protein rac-like GTP-binding protein 7, putative, expressed Rop…	Rac-like GTP binding protein
Signaling	solyc01g108970.2	-1.473	weakly similar to ( 117) AT2G15900 | Symbols: | phox (PX) domain-containing protein | chr2:6927390-6932535 FORWARDvery weakly similar to ( 100) loc_os11g06040 12011.m04801 protein PX domain containing protein, expressed genomic_reference:SL2.40ch01 gene_region:87840228-87843765 transcript_region:SL2.40ch01:87840228..87843765- go_terms:GO:0007154 functional_description:"Phox domain-containing prot…	Phox domain-containing protein
Signaling	solyc01g104930.1	-1.561	moderately similar to ( 230) AT4G04910 | Symbols: NSF | NSF (N-ethylmaleimide sensitive factor); ATP binding / binding / nucleoside-triphosphatase/ nucleotide binding | chr4:2489696-2495666 REVERSEweakly similar to ( 200) loc_os05g44310 12005.m08557 protein vesicle-fusing ATPase, putative, expressed evidence_code:10F0H1E0IEG genomic_reference:SL2.40ch01 gene_region:85019920-85022342 transcript_re…	Vesicle-fusing ATPase
Signaling	solyc10g086320.1	-2.15	nearly identical (1022) AT3G09920 | Symbols: PIP5K9 | PIP5K9 (PHOSPHATIDYL INOSITOL MONOPHOSPHATE 5 KINASE); 1-phosphatidylinositol-4-phosphate 5-kinase/ ATP binding / phosphatidylinositol phosphate kinase | chr3:3040426-3043676 REVERSEhighly similar to ( 655) PI5K1_ORYSA Phosphatidylinositol-4-phosphate 5-kinase 1 precursor (EC 2.7.1.68) (1-phosphatidylinositol-4-phosphate kinase) (PIP5K) (PtdIn…	Phosphatidylinositol-4-phosphate 5-kinase 9
Signaling	solyc09g092110.2	-2.16	very weakly similar to (85.1) AT3G26740 | Symbols: CCL | CCL (CCR-LIKE) | chr3:9827868-9828461 FORWARDvery weakly similar to (80.1) LIRP1_ORYSA Light-regulated protein precursor - Oryza sativa (Rice)very weakly similar to (80.1) loc_os01g01340 12001.m42821 protein light-induced protein 1-like, putative, expressedLir1 genomic_reference:SL2.40ch09 gene_region:66609577-66610499 transcript_region:SL2…	Light regulated protein-like protein
Signaling	solyc05g050590.2	-4.83	highly similar to ( 734) AT2G46500 | Symbols: | phosphatidylinositol 3- and 4-kinase family protein / ubiquitin family protein | chr2:19086741-19088534 REVERSEhighly similar to ( 618) loc_os05g51230 12005.m09188 protein phosphatidylinositol 3- and 4-kinase family protein, expressed PI3_PI4_kinase genomic_reference:SL2.40ch05 gene_region:59890165-59893304 transcript_region:SL2.40ch05:59890165..598…	Phosphatidylinositol 3-and 4-kinase family

[truncated: 11 more sheets: PR and R proteins, Transport, Cell, DNA, Cell wall, Metabolism, Development, Abiotic stress, RNA, Redox, Unclassified]
